# Supplementary material
Source: publisher figshare collection journal article supplement (https://acs.figshare.com/ndownloader/files/4336279)
Supplement: Supplementary file 1 [file 4336279]

# Direct Enantioselective Aldol-Tishchenko Reaction Catalyzed by Lithium Diphenylbinaphtholate

Tomonori Ichibakase and Makoto Nakajima\*

*Graduate School of Pharmaceutical Sciences, Kumamoto University, Kumamoto 862-0973, Japan*

## Supporting Information

### Table of Contents

|                                                                                                       |      |
|-------------------------------------------------------------------------------------------------------|------|
| 1. General methods                                                                                    | S-2  |
| 2. The aldol-Tishchenko reaction of 3-pentanone ( <b>2a</b> ) and benzaldehyde ( <b>3a</b> )          | S-2  |
| 3. Isomerization of <b>4aa</b> to <b>5aa</b> and <b>5aa</b> to <b>4aa</b>                             | S-3  |
| 4. The aldol-Tishchenko reaction and subsequent deacylation                                           | S-3  |
| 5. The aldol-aldol-Tishchenko reaction of cyclopentanone ( <b>2f</b> ) and benzaldehyde ( <b>3a</b> ) | S-7  |
| 6. The Evans-Tishchenko reduction of racemic $\beta$ -hydroxy ketone ( <b>10</b> )                    | S-9  |
| 7. The Evans-Tishchenko reduction of $\beta$ -hydroxy ketone ( <b>11</b> )                            | S-9  |
| 8. References                                                                                         | S-10 |
| 9. $^1\text{H}$ NMR and HPLC chart of the Tishchenko products                                         | S-11 |
| 10. $^{13}\text{C}$ NMR chart of new compounds                                                        | S-23 |
| 11. $^1\text{H}$ NMR chart and X-ray structure report for <b>9</b>                                    | S-26 |

## 1. General Methods

$^1\text{H}$  and  $^{13}\text{C}$  NMR spectra were measured in  $\text{CDCl}_3$  with JEOL JNM-ECX400 spectrometer. Tetramethylsilane (TMS) ( $\delta = 0$  ppm) and  $\text{CDCl}_3$  ( $\delta = 77.0$  ppm) were served as internal standards for  $^1\text{H}$  and  $^{13}\text{C}$  NMR, respectively. Infrared spectra were recorded on JEOL JIR 6500-W. Mass spectra were measured with JEOL JMS-DX303HF mass spectrometer. Optical rotations were recorded on JASCO P-1010 polarimeter. High-pressure liquid chromatography (HPLC) was performed on JASCO P-980 and UV-1575.

Thin-layer chromatography (TLC) analysis was carried out using Merck silica gel plates. Visualization was accomplished with UV light, phosphomolybdic acid and/or anisaldehyde. Column chromatography was performed using Kanto Chemical Silica Gel 60N (spherical, neutral, 63-210  $\mu\text{m}$ ).

Absolute configurations of **4aa**, **5aa**, **6aa** ~ **6ad**, **6ba**, **7da**, **12** were determined by the comparison of  $[\alpha]_{\text{D}}$  data or HPLC data in the literatures. Absolute configurations of **6ae**, **6ca**, **7ea** were determined by analogy.

## 2. The aldol-Tishchenko reaction of 3-pentanone (**2a**) and benzaldehyde (**3a**).

Under an argon atmosphere, *n*-BuLi (0.094 mmol, 20 mol %) in hexane (0.17 M, 0.55 mL) was added to a solution of (*R*)-3,3'-diphenylbinaphthol (20.7 mg, 0.047 mmol, 10 mol %) in THF at 0  $^{\circ}\text{C}$ , and the mixture was stirred for 5 min. Benzaldehyde (**3a**) (0.12 mL, 1.18 mmol, 2.5 equiv.) and 3-pentanone (**2a**) (0.05 mL, 0.47 mmol) were successively added to the above mixture at rt and the mixture was stirred for 3 h. The reaction was quenched with sat.  $\text{NH}_4\text{Cl}$  (2 mL) and the mixture was stirred for 5 min at rt. The aqueous layer was extracted with AcOEt and the combined organic layers were washed with brine (3 mL). After drying over  $\text{Na}_2\text{SO}_4$  and concentration in vacuo, the residue was purified by column chromatography ( $\text{SiO}_2$ ,  $\text{CH}_2\text{Cl}_2$ ) to afford monoacylated diol **4aa** (61 mg, 44% yield) and **5aa** (31 mg, 22% yield) both as a colorless oil.

### (1*R*,2*R*,3*S*)-2-Methyl-1-phenyl-1,3-pentanediol 1-*O*-benzoate (**4aa**)<sup>1</sup>.

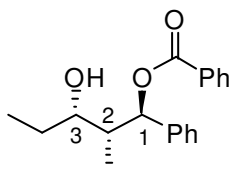

$^1\text{H}$  NMR ( $\text{CDCl}_3$ , 400 MHz)  $\delta$  0.75 (d, 3H,  $J = 6.9$  Hz,  $-\text{CHCH}_3$ ), 0.95 (t, 3H,  $J = 7.3$  Hz,  $-\text{CH}_2\text{CH}_3$ ), 1.38-1.49 (m, 1H,  $-\text{CH}_2\text{CH}_3$ ), 1.57-1.68 (m, 1H,  $-\text{CH}_2\text{CH}_3$ ), 2.08-2.16 (m, 1H,  $-\text{CHCH}_3$ ), 2.47 (brs, 1H,  $-\text{OH}$ ), 3.72-3.77 (m, 1H,  $\text{HO}-\text{CH}$ ), 5.95 (d, 1H,  $J = 10.1$  Hz,  $\text{BzO}-\text{CHPh}$ ), 7.29-7.46 (m, 7H,  $\text{Ar}-\text{H}$ ), 7.54-7.58 (m, 1H,  $\text{Ar}-\text{H}$ ), 8.04-8.07 (m, 2H,  $\text{Ar}-\text{H}$ ).

$[\alpha]_{\text{D}}^{30} +12.6$  (c 1.19,  $\text{CHCl}_3$ , 85% ee),  $[\alpha]_{\text{D}}^{30} +11.6$  (c 0.73,  $\text{CH}_2\text{Cl}_2$ , 85% ee), [lit. 1:  $[\alpha]_{\text{D}} -8.5$  (c 0.73,  $\text{CH}_2\text{Cl}_2$ , 73% ee, 1*S*, 2*S*, 3*R*)]

HPLC (Daicel chiralcel OD-H, Hex/IPA = 97/3, 1.0 mL/min):  $t_{\text{R}}$  (min) 6.6 (major, 1*R*, 2*R*, 3*S*), 7.8 (minor, 1*S*, 2*S*, 3*R*), [lit. 1: 8.1 (1*R*, 2*R*, 3*S*), 8.7 (1*S*, 2*S*, 3*R*)].

### (1*R*,2*R*,3*S*)-2-Methyl-1-phenyl-1,3-pentanediol 3-*O*-benzoate (**5aa**)<sup>1</sup>.

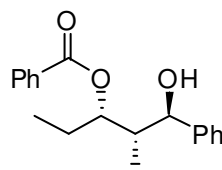

$^1\text{H}$  NMR ( $\text{CDCl}_3$ , 400 MHz)  $\delta$  0.75 (d, 3H,  $J = 6.9$  Hz,  $-\text{CHCH}_3$ ), 1.00 (t, 3H,  $J = 7.3$  Hz,  $-\text{CH}_2\text{CH}_3$ ), 1.61-1.71 (m, 1H,  $-\text{CH}_2\text{CH}_3$ ), 1.88-2.09 (m, 2H,  $-\text{CH}_2\text{CH}_3$ ,  $-\text{CHCH}_3$ ), 3.74 (d, 1H,  $J = 3.6$  Hz,  $-\text{OH}$ ), 4.19 (dd, 1H,  $J = 9.6, 3.2$

Hz, HO-CHPh), 5.62 (ddd, 1H,  $J = 8.7, 5.0, 1.4$  Hz, BzO-CH), 7.24-7.37 (m, 5H, Ar-*H*), 7.47-7.51 (m, 2H, Ar-*H*), 7.59-7.63 (m, 1H, Ar-*H*), 8.10-8.13 (m, 2H, Ar-*H*).

$[\alpha]_D^{30} -0.3$  ( $c$  1.07, CHCl<sub>3</sub>, 85% ee),  $[\alpha]_D^{31} +9.1$  ( $c$  0.96, MeOH, 85% ee),  $[\alpha]_D^{29} -3.7$  ( $c$  1.09, CH<sub>2</sub>Cl<sub>2</sub>, 85% ee), [lit. 1:  $[\alpha]_D +3.3$  ( $c$  1.00, CH<sub>2</sub>Cl<sub>2</sub>, 72% ee, 1*S*, 2*S*, 3*R*)]

HPLC (Daicel chiralpak AD-H, Hex/IPA = 19/1, 1.0 mL/min):  $t_R$  (min) 12.1 (major, 1*R*, 2*R*, 3*S*), 20.5 (minor, 1*S*, 2*S*, 3*R*), [lit. 1: 12.3 (1*R*, 2*R*, 3*S*), 21.6 (1*S*, 2*S*, 3*R*)].

### 3. Isomerization of 4aa to 5aa and 5aa to 4aa.

Under an argon atmosphere, *n*-BuLi (0.094 mmol) in hexane (0.17 M, 0.55 mL) was added to a solution of (*R*)-3,3'-diphenylbinaphthol (20.7 mg, 0.047 mmol) and **4aa** (54.9 mg) or **5aa** (16.8 mg) in THF at 0 °C, and the mixture was stirred for 3 h. The reaction was quenched with sat. NH<sub>4</sub>Cl (2 mL) and the mixture was stirred for 5 min at rt. The aqueous layer was extracted with AcOEt and the combined organic layers were washed with brine (3 mL). After drying over Na<sub>2</sub>SO<sub>4</sub> and concentration in vacuo, the residue was purified by column chromatography (SiO<sub>2</sub>, CH<sub>2</sub>Cl<sub>2</sub>) to afford monoacylated diol **4aa** and **5aa** both as a colorless oil.

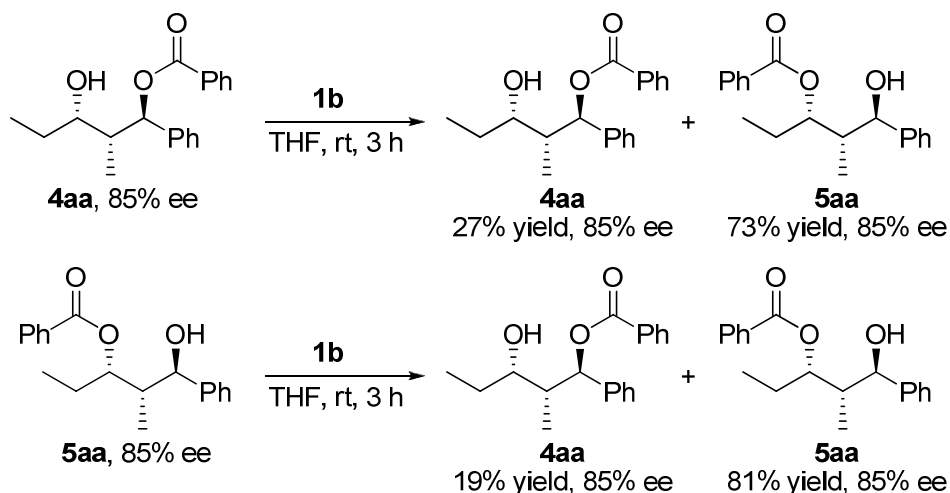

### 4. The aldol-Tishchenko reaction and subsequent deacylation.

#### Typical procedure:

Under an argon atmosphere, *n*-BuLi (0.094 mmol, 20 mol %) in hexane (0.17 M, 0.55 mL) was added to a solution of (*R*)-3,3'-diphenylbinaphthol (20.7 mg, 0.047 mmol, 10 mol %) in THF at 0 °C, and the mixture was stirred for 5 min. Benzaldehyde (**3a**) (0.12 mL, 1.18 mmol, 2.5 equiv.) and 3-pentanone (**2a**) (0.05 mL, 0.47 mmol) were successively added to the above mixture and the mixture was stirred for 48 h. The reaction was quenched with sat. NH<sub>4</sub>Cl (2 mL) and the mixture was stirred for 5 min at rt. The aqueous layer was extracted with AcOEt and the combined organic layers were washed with brine (3 mL). After drying over Na<sub>2</sub>SO<sub>4</sub> and concentration in vacuo, the residue was dissolved in MeOH (2 mL) and treated with NaOMe (0.05 mmol, 11 mol %) in MeOH (0.5 M, 0.1 mL). After 3 h, the mixture was diluted with AcOEt (20 mL), and washed with water (5 mL). The aqueous layer was extracted twice with AcOEt (10 mL x 2) and the combined organic layers were washed with brine (10 mL) and dried over Na<sub>2</sub>SO<sub>4</sub>. After concentration in vacuo, the residue was purified by column chromatography (SiO<sub>2</sub>, hexane/AcOEt = 4/1) to give diol **6aa** (74 mg, 81%) as a colorless oil.

**(1*R*,2*R*,3*S*)-2-Methyl-1-phenylpentane-1,3-diol (**6aa**)<sup>1</sup>.**

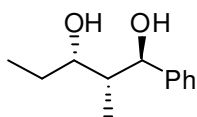

<sup>1</sup>H NMR (CDCl<sub>3</sub>, 400 MHz)  $\delta$  0.85 (d, 3H,  $J$  = 6.8 Hz, -CHCH<sub>3</sub>), 0.89 (t, 3H,  $J$  = 7.3 Hz, CH<sub>2</sub>CH<sub>3</sub>), 1.36-1.56 (m, 2H, -CH<sub>2</sub>CH<sub>3</sub>), 1.88-1.95 (m, 1H, -CHCH<sub>3</sub>), 2.91 (brs, 1H, -OH), 3.54 (brs, 1H, -OH), 3.70 (ddd, 1H,  $J$  = 8.7, 4.6, 2.3 Hz, HO-CH), 4.67 (d, 1H,  $J$  = 6.9 Hz, HO-CH), 7.22-7.36 (m, 5H, Ar-H).

$[\alpha]_D^{29} +45.4$  ( $c$  1.22, CHCl<sub>3</sub>, 91% ee),  $[\alpha]_D^{29} +43.6$  ( $c$  1.01, CH<sub>2</sub>Cl<sub>2</sub>, 91% ee), [lit. 1:  $[\alpha]_D$  -36.2 ( $c$  0.60, CH<sub>2</sub>Cl<sub>2</sub>, 75% ee, 1*S*, 2*S*, 3*R*)]

HPLC (Daicel chiralpak AD-H, Hex/IPA = 19/1, 1.0 mL/min):  $t_R$  (min) 14.7 (major, 1*R*, 2*R*, 3*S*), 20.3 (minor, 1*S*, 2*S*, 3*R*), [lit. 1: Hex/IPA = 9/1, 7.8 (1*R*, 2*R*, 3*S*), 10.1 (1*S*, 2*S*, 3*R*)].

**(1*R*,2*R*,3*S*)-2-Methyl-1-(4-methylphenyl)pentane-1,3-diol (**6ab**)<sup>1</sup>.**

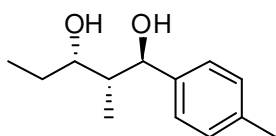

Following the typical procedure, the reaction of *p*-tolualdehyde (**3b**) (0.14 mL, 1.18 mmol, 2.5 equiv.) and 3-pentanone (**2a**) (0.05 mL, 0.47 mmol) gave diol **6ab** (85.3 mg, 87%) as a colorless oil.

<sup>1</sup>H NMR (CDCl<sub>3</sub>, 400 MHz)  $\delta$  0.81 (d, 3H,  $J$  = 7.3 Hz, -CHCH<sub>3</sub>), 0.89 (t, 3H,  $J$  = 7.3 Hz, -CH<sub>2</sub>CH<sub>3</sub>), 1.35-1.58 (m, 2H, -CH<sub>2</sub>CH<sub>3</sub>), 1.85-1.92 (m, 1H, -CHCH<sub>3</sub>), 2.33 (s, 3H, Ar-CH<sub>3</sub>), 3.07 (brs, 1H, -OH), 3.53 (brs, 1H, -OH), 3.69 (ddd, 1H,  $J$  = 8.7, 4.6, 1.8 Hz, HO-CH), 4.62 (d,  $J$  = 6.8 Hz, HO-CHAr), 7.13 (d, 2H,  $J$  = 7.8 Hz, Ar-H), 7.20 (d, 2H,  $J$  = 7.8 Hz, Ar-H).

$[\alpha]_D^{29} +41.0$  ( $c$  1.05, CHCl<sub>3</sub>, 95% ee)

HPLC (Daicel chiralpak AD-H, Hex/IPA = 29/1, 1.0 mL/min):  $t_R$  (min) 24.6 (major, 1*R*, 2*R*, 3*S*), 29.4 (minor, 1*S*, 2*S*, 3*R*), [lit. 1: Hex/IPA = 9/1, 8.4 (1*R*, 2*R*, 3*S*), 9.1 (1*S*, 2*S*, 3*R*)].

**(1*R*,2*R*,3*S*)-1-(4-methoxyphenyl)-2-Methylpentane-1,3-diol (**6ac**)<sup>1</sup>.**

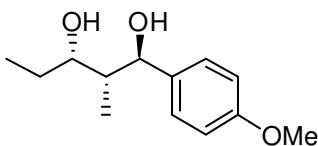

Following the typical procedure, the reaction of *p*-anisaldehyde (**3c**) (0.14 mL, 1.18 mmol, 2.5 equiv.) and 3-pentanone (**2a**) (0.05 mL, 0.47 mmol) gave diol **6ac** (84.9 mg, 81%) as a colorless oil.

<sup>1</sup>H NMR (CDCl<sub>3</sub>, 400 MHz)  $\delta$  0.79 (d, 3H,  $J$  = 7.4 Hz, -CHCH<sub>3</sub>), 0.90 (t, 3H,  $J$  = 7.3 Hz, -CH<sub>2</sub>CH<sub>3</sub>), 1.38-1.58 (m, 2H, -CH<sub>2</sub>CH<sub>3</sub>), 1.83-1.91 (m, 1H, -CHCH<sub>3</sub>), 3.12 (brs, 1H, -OH), 3.62 (brs, 1H, -OH), 3.69 (ddd, 1H,  $J$  = 8.2, 4.1, 1.8 Hz, HO-CH), 3.78 (s, 3H, -OCH<sub>3</sub>), 4.60 (d,  $J$  = 7.3 Hz, HO-CHAr), 6.84-6.88 (m, 2H, Ar-H), 7.21-7.25 (m, 2H, Ar-H).

$[\alpha]_D^{29} +41.8$  ( $c$  0.75, CHCl<sub>3</sub>, 95% ee)

HPLC (Daicel chiralpak AD-H, Hex/IPA = 9/1, 1.0 mL/min):  $t_R$  (min) 11.0 (major, 1*R*, 2*R*, 3*S*), 12.4 (minor, 1*S*, 2*S*, 3*R*), [lit. 1: 11.3 (1*R*, 2*R*, 3*S*), 12.7 (1*S*, 2*S*, 3*R*)].

**(1*R*,2*R*,3*S*)-1-(4-Bromophenyl)-2-methylpentane-1,3-diol (6ad)<sup>1</sup>.**

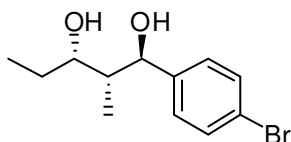

Following the typical procedure, the reaction of *p*-bromobenzaldehyde (**3d**) (212.4 mg, 1.18 mmol, 2.5 equiv.) and 3-pentanone (**2a**) (0.05 mL, 0.47 mmol) gave diol **6ad** (102.5 mg, 80%) as a colorless prism.

mp 96-97 °C

<sup>1</sup>H NMR (CDCl<sub>3</sub>, 400 MHz) δ 0.84-0.89 (m, 6H, -CHCH<sub>3</sub>, -CH<sub>2</sub>CH<sub>3</sub>), 1.34-1.54 (m, 2H, -CH<sub>2</sub>CH<sub>3</sub>), 1.80-1.87 (m, 1H, -CHCH<sub>3</sub>), 3.04 (brs, 1H, -OH), 3.63 (ddd, 1H, *J* = 8.7, 5.0, 2.3 Hz, HO-CH), 4.08 (brs, 1H, -OH), 4.60 (d, 1H, *J* = 6.4 Hz, HO-CHAr), 7.15-7.19 (m, 2H, Ar-*H*), 7.43-7.46 (m, 2H, Ar-*H*).

[α]<sub>D</sub><sup>29</sup> +34.5 (*c* 1.05, CHCl<sub>3</sub>, 88% ee)

HPLC (Daicel chiralpak AS-H, Hex/IPA = 9/1, 1.0 mL/min): *t*<sub>R</sub> (min) 7.2 (major, 1*R*, 2*R*, 3*S*), 10.2 (minor, 1*S*, 2*S*, 3*R*), [lit. 1: 6.3(1*R*, 2*R*, 3*S*), 10.1 (1*S*, 2*S*, 3*R*)].

**(1*E*,3*R*,4*R*,5*S*)-4-Methyl-1-phenyl-1-heptane-3,5-diol (6ae).**

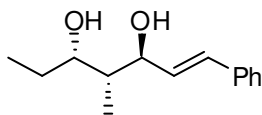

Following the typical procedure, the reaction of *trans*-cinnamaldehyde (**3e**) (0.15 mL, 1.18 mmol, 2.5 equiv.) and 3-pentanone (**2a**) (0.05 mL, 0.47 mmol) gave diol **6ae** (62.8 mg, 61%) as a colorless oil.

<sup>1</sup>H NMR (CDCl<sub>3</sub>, 400 MHz) δ 0.92-0.98 (m, 6H, -CHCH<sub>3</sub>, -CH<sub>2</sub>CH<sub>3</sub>), 1.49-1.61 (m, 2H, -CH<sub>2</sub>CH<sub>3</sub>), 1.73-1.80 (m, 1H, -CHCH<sub>3</sub>), 2.85 (brs, 1H, -OH), 3.29 (brs, 1H, -OH), 3.84-3.88 (m, 1H, HO-CH), 4.30 (t, 1H, *J* = 6.4 Hz, HO-CH), 6.25 (dd, 1H, *J* = 16.0, 6.4 Hz, olefine-*H*), 6.62 (d, 1H, *J* = 15.6 Hz), 7.21-7.39 (m, 5H, Ar-*H*).

<sup>13</sup>C NMR (CDCl<sub>3</sub>, 100 MHz) δ 10.63, 11.02, 26.71, 41.78, 74.10, 76.61, 126.41, 127.52, 128.50, 130.74, 131.60, 136.68.

IR (neat) ν 3552 cm<sup>-1</sup>.

LR-FABMS (CHCl<sub>3</sub>+NBA+NaI) 243 ((M+Na)<sup>+</sup>), 241, 176 (bp), 145, 136, 55.

HR-FABMS calcd for C<sub>14</sub>H<sub>20</sub>O<sub>2</sub>Na ((M+Na)<sup>+</sup>) 243.1361, found 243.1340.

[α]<sub>D</sub><sup>29</sup> +6.9 (*c* 1.27, CHCl<sub>3</sub>, 94% ee), [α]<sub>D</sub><sup>31</sup> +15.4 (*c* 1.14, benzene, 94% ee)

HPLC (Daicel chiralpak AD-H, Hex/IPA = 19/1, 1.0 mL/min): *t*<sub>R</sub> (min) 18.5 (major, 3*R*, 4*R*, 5*S*), 21.2 (minor, 3*S*, 4*S*, 5*R*).

**(1*R*,2*R*,3*S*)-2-Ethyl-1-phenylhexane-1,3-diol (6ba)<sup>1</sup>.**

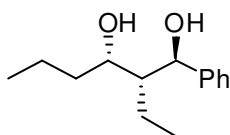

Following the typical procedure, the reaction of benzaldehyde (**3a**) (0.12 mL, 1.18 mmol, 2.5 equiv.) and 4-heptanone (**2b**) (0.07 mL, 0.47 mmol) gave diol **6ba** (69.4 mg, 71%) as a colorless oil.

<sup>1</sup>H NMR (CDCl<sub>3</sub>, 400 MHz) δ 0.82 (t, 3H, *J* = 6.9 Hz, -CHCH<sub>2</sub>CH<sub>3</sub>), 0.91 (t, 3H, *J* = 7.3 Hz, CH<sub>2</sub>CH<sub>2</sub>CH<sub>3</sub>), 1.16-1.63 (m, 7H, -CHCH<sub>2</sub>CH<sub>3</sub>, -CH<sub>2</sub>CH<sub>2</sub>CH<sub>3</sub>), 3.32 (brs, 1H, -OH), 3.74 (ddd, *J* = 9.2, 4.1, 1.8 Hz, HO-CH), 3.89 (brs, 1H, -OH), 4.85 (d, 1H, *J* = 5.5 Hz), 7.22-7.35 (m, 5H, Ar-*H*).

$[\alpha]_D^{28} +37.6$  ( $c$  0.99,  $\text{CHCl}_3$ , 91% ee)

HPLC (Daicel chiralpak AS-H, Hex/IPA = 19/1, 1.0 mL/min):  $t_R$  (min) 8.6 (major, 1*R*, 2*R*, 3*S*), 11.4 (minor, 1*S*, 2*S*, 3*R*), [lit. 1: Hex/IPA = 9/1, 5.1 (1*R*, 2*R*, 3*S*), 5.7 (1*S*, 2*S*, 3*R*)].

**(1*R*,2*R*,3*S*,4*E*)-2-Methyl-1-phenyl-4-hexene-1,3-diol (6*ca*).**

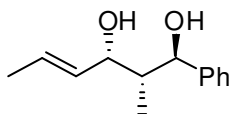

Following the typical procedure, the reaction of benzaldehyde (**3a**) (0.12 mL, 1.18 mmol, 2.5 equiv.) and 4-hexene-3-one (**2c**) (0.05 mL, 0.47 mmol) gave diol **6ca** (77.8 mg, 80%) as a colorless oil.

$^1\text{H}$  NMR ( $\text{CDCl}_3$ , 400 MHz)  $\delta$  0.69 (d, 3H,  $J$  = 7.3 Hz,  $-\text{CHCH}_3$ ), 1.72 (d, 3H,  $J$  = 5.5 Hz,  $-\text{CH}=\text{CHCH}_3$ ), 1.96-2.04 (m, 1H,  $-\text{CHCH}_3$ ), 3.42 (brs, 1H,  $-\text{OH}$ ), 3.87 (brs, 1H,  $-\text{OH}$ ), 4.20-4.23 (m, 1H,  $\text{HO}-\text{CH}$ ), 4.57 (d, 1H,  $J$  = 8.3 Hz), 5.56-5.89 (m, 2H, olefine- $H$ ), 7.23-7.34 (m, 5H, Ar- $H$ ).

$^{13}\text{C}$  NMR ( $\text{CDCl}_3$ , 100 MHz)  $\delta$  12.5, 17.8, 44.2, 75.0, 77.9, 126.6, 127.5, 127.7, 128.3, 130.7, 143.6.

IR (neat)  $\nu$  3354  $\text{cm}^{-1}$ .

LR-FABMS ( $\text{CHCl}_3$ +NBA+NaI) 229 ( $(\text{M}+\text{Na})^+$ , bp), 173, 149, 107, 55.

HR-FABMS calcd for  $\text{C}_{13}\text{H}_{18}\text{O}_2\text{Na}$  ( $(\text{M}+\text{Na})^+$ ) 229.1204, found 229.1200.

$[\alpha]_D^{28} +5.7$  ( $c$  1.34,  $\text{CHCl}_3$ , 87% ee)

HPLC (Daicel chiralcel OD-H, Hex/IPA = 19/1, 1.0 mL/min):  $t_R$  11.1 (minor, 1*S*, 2*S*, 3*R*), 12.2 (major, 1*R*, 2*R*, 3*S*).

**(1*S*,2*S*, $\alpha$ *R*)- $\alpha$ -(2-Hydroxycyclohexyl)-benzenemethanol (7*da*)<sup>2</sup>.**

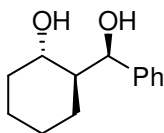

Following the typical procedure, the reaction of benzaldehyde (**3a**) (0.12 mL, 1.18 mmol, 2.5 equiv.) and cyclohexanone (**2d**) (0.05 mL, 0.47 mmol) in THF (3 mL) gave diol **7da** (87.5 mg, 87%) as colorless needles.

mp 122-124 °C

$^1\text{H}$  NMR ( $\text{CDCl}_3$ , 400 MHz)  $\delta$  0.78-0.92 (m, 1H), 1.02-1.15 (m, 2H), 1.25-1.35 (m, 1H), 1.50-1.65 (m, 3H), 1.74-1.81 (m, 1H), 1.89-1.93 (m, 1H), 3.23 (brs, 1H), 3.49 (dt, 1H,  $J$  = 10.5, 4.6 Hz), 3.70 (brs, 1H), 4.92 (s, 1H), 7.24-7.36 (m, 5H).

$[\alpha]_D^{27} +27.6$  ( $c$  1.02,  $\text{CHCl}_3$ , 90% ee), [lit. 2:  $[\alpha]_D +32$  ( $c$  0.95,  $\text{CHCl}_3$ , 99% ee, 1*S*, 2*S*,  $\alpha$ *R*)]

HPLC (Daicel chiralcel OD-H, Hex/IPA = 9/1, 1.0 mL/min):  $t_R$  (min) 7.3 (minor, 1*R*, 2*R*,  $\alpha$ *S*), 8.7 (major, 1*S*, 2*S*,  $\alpha$ *R*).

**(1*S*,2*S*, $\alpha$ *R*)- $\alpha$ -(2-Hydroxycyclohex-3-enyl)-benzenemethanol (7ea).**

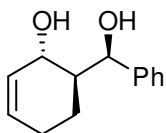

Following the typical procedure, the reaction of benzaldehyde (**3a**) (0.12 mL, 1.18 mmol, 2.5 equiv.) and 2-cyclohexene-1-one (**2e**) (0.05 mL, 0.47 mmol) in THF (3mL) at -23 °C gave diol **6ea** (84.2 mg, 88%) as colorless needles.

mp 135-137 °C

<sup>1</sup>H NMR (CDCl<sub>3</sub>, 400 MHz)  $\delta$  1.15-1.24 (m, 1H), 1.62-1.67 (m, 1H), 1.93-2.09 (m, 3H), 2.71 (brs, 1H), 3.12 (brs, 1H), 4.24 (d, 1H, *J* = 8.7 Hz), 4.98 (s, 1H), 5.56-5.60 (m, 1H), 5.70-5.72 (m, 1H), 7.26-7.38 (m, 5H).

<sup>13</sup>C NMR (CDCl<sub>3</sub>, 100 MHz)  $\delta$  22.2, 25.0, 47.4, 68.1, 76.2, 126.5, 127.4, 128.1, 128.8, 130.3, 142.0.

IR (KBr)  $\nu$  3313cm<sup>-1</sup>.

LR-FABMS (CHCl<sub>3</sub>+NBA+NaI) 227 ((M+Na)<sup>+</sup>, bp), 173, 149, 107, 77.

HR-FABMS calcd for C<sub>13</sub>H<sub>16</sub>O<sub>2</sub>Na ((M+Na)<sup>+</sup>) 227.1048, found 227.1030.

$[\alpha]_D^{27}$  -11.4 (*c* 0.99, CHCl<sub>3</sub>, 85% ee)

HPLC (Daicel chiralcel OD-H, Hex/IPA = 9/1, 1.0 mL/min): *t*<sub>R</sub> (min) 8.8 (minor, 1*R*, 6*R*, *S*), 11.3 (major, 1*S*, 6*S*, *R*).

**5. The aldol-aldol-Tishchenko reaction of cyclopentanone (2f) and benzaldehyde (3a).**

Under an argon atmosphere, *n*-BuLi (0.094 mmol, 20 mol %) in hexane (0.17 M, 0.55 mL) was added to a solution of (*R*)-3,3'-diphenylbinaphthol (20.7 mg, 0.047 mmol, 10 mol %) in THF at -23 °C, and the mixture was stirred for 5 min. Then benzaldehyde (**3a**) (0.17mL, 1.65 mmol, 3.5 equiv) and cyclopentanone (**2f**) (0.04 mL, 0.47 mmol) were added to the above mixture. After 24 h, the reaction was quenched with sat. NH<sub>4</sub>Cl (2 mL) and the mixture was stirred for 5 min at rt. The aqueous layer was extracted with AcOEt and the combined organic layers were successively washed with brine (3 mL). Drying over Na<sub>2</sub>SO<sub>4</sub> and concentration in vacuo, the residue was purified by column chromatography (SiO<sub>2</sub>, CH<sub>2</sub>Cl<sub>2</sub>) to give an inseparable mixture of triol mono esters as a colorless oil. To the solution of the mono ethers, pyridinium *p*-toluenesulfonate (1.2 mg, 0.047 mmol, 10 mol %) and 2,2-dimethoxypropane (0.09 mL, 0.71 mmol, 1.5 equiv) was added and the mixture was stirred for 12 h. After diluted with AcOEt (20 mL), the mixture was washed with water (5 mL x 3) and brine (10 mL) and dried over Na<sub>2</sub>SO<sub>4</sub>. After concentration in vacuo, the residue was purified by column chromatography (SiO<sub>2</sub>, hexane/toluene = 1/1) to give **8** (137 mg, 66%, 2 steps) as colorless needles and its diastereomer **8'** (46 mg, 22 %, 2 steps) as colorless needles.

**(*rel*-1*S*,2*S*,3*R*,1 $\alpha$ *R*,2 $\alpha$ *R*)-2-Hydroxy- $\alpha$ 1, $\alpha$ 2-diphenyl-1,3-cyclopentanedimethanol 2, $\alpha$ 2-*O*,*O*-acetonide  $\alpha$ 1-*O*-benzoate (8).**

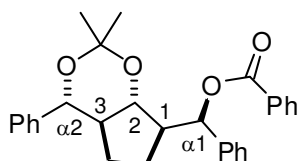

mp 114-115 °C

<sup>1</sup>H NMR (CDCl<sub>3</sub>, 400 MHz)  $\delta$  1.20-1.32 (m, 1H), 1.40-1.52 (m, 1H), 1.44 (s, 3H), 1.49 (s, 3H), 1.63-1.85 (m, 3H), 2.47-2.55 (m, 1H), 3.60 (t, 1H, *J* = 10.1 Hz), 4.60 (d, 1H, *J* = 10.1 Hz), 6.22 (d, 1H, *J* = 4.6 Hz), 7.21-7.33 (m,

8H), 7.39-7.42 (m, 2H), 7.45-7.49 (m, 2H), 7.55-7.60 (m, 1H), 8.13-8.16 (m, 2H).

$^{13}\text{C}$  NMR ( $\text{CDCl}_3$ , 100 MHz)  $\delta$  19.91, 21.10, 21.58, 29.90, 47.77, 48.63, 75.41, 75.70, 78.65, 100.50, 126.13, 126.40, 127.62, 127.70, 128.17, 128.32, 128.43, 129.60, 130.37, 133.00, 139.43, 140.71, 165.47.

IR (neat)  $\nu$  1718  $\text{cm}^{-1}$ .

LR-FABMS ( $\text{CHCl}_3$ +NBA+NaI) 465 ( $(\text{M}+\text{Na})^+$ ), 413, 385, 329, 263, 245, 176, 154 (bp), 136, 105, 77.

HR-FABMS calcd for  $\text{C}_{29}\text{H}_{30}\text{O}_4\text{Na}$  ( $(\text{M}+\text{Na})^+$ ) 465.2042, found 465.2043.

$[\alpha]_{\text{D}}^{27}$  -8.2 ( $c$  1.01,  $\text{CHCl}_3$ , 99% ee)

HPLC (Daicel chiralpak AD-H, Hex/IPA = 99/1, 1.0 mL/min):  $t_{\text{R}}$  (min) 14.4 (major), 17.4 (minor).

#### diastereomer of **8** (**8'**).

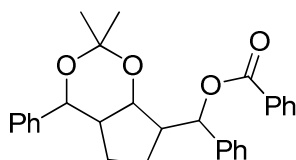

mp 116-117  $^{\circ}\text{C}$

$^1\text{H}$  NMR ( $\text{CDCl}_3$ , 400 MHz)  $\delta$  1.19 (s, 3H), 1.33 (s, 3H), 1.45-1.57 (m, 2H), 1.71-1.78 (m, 1H), 1.92-1.99 (m, 1H), 2.24-2.33 (m, 1H), 2.61-2.69 (m, 1H), 4.08 (dd, 1H,  $J$  = 7.8, 5.0 Hz), 4.44 (d, 1H,  $J$  = 10.1 Hz), 6.08 (d, 1H,  $J$  = 7.3 Hz), 7.24-7.59 (m, 13H), 8.07-8.11 (m, 2H).

$^{13}\text{C}$  NMR ( $\text{CDCl}_3$ , 100 MHz)  $\delta$  23.61, 25.37, 27.11, 28.51, 49.41, 52.69, 73.61, 75.18, 77.60, 100.43, 126.58, 126.82, 127.59, 127.83, 128.23, 128.39, 129.62, 130.34, 133.01, 139.58, 141.20, 165.70.

IR (KBr)  $\nu$  1711  $\text{cm}^{-1}$ .

LR-FABMS ( $\text{CHCl}_3$ +NBA+NaI) 466 ( $(\text{M}+\text{Na})^+$ ), 414, 386, 329, 263, 245, 176, 105 (bp), 91. HR-FABMS calcd for  $\text{C}_{29}\text{H}_{30}\text{O}_4\text{Na}$  ( $(\text{M}+\text{Na})^+$ ) 465.2042, found 465.2046.

$[\alpha]_{\text{D}}^{27}$  -30.0 ( $c$  1.52,  $\text{CHCl}_3$ , 98% ee)

HPLC (Daicel chiralpak AD-H, Hex/IPA = 99/1, 1.0 mL/min):  $t_{\text{R}}$  (min) 19.0 (major), 25.8 (minor).

To the solution of **8** in MeOH (2 mL), NaOMe (0.05 mmol, 11 mol %) in MeOH (0.5 M, 0.1 mL) was added and the resulting homogeneous mixture was stirred for 12 h. The reaction was quenched with conc. HCl aq. (5 mL) and the mixture was stirred for 1 h at rt. The mixture was diluted with ethyl acetate (20 mL), and washed with water (5 mL). The aqueous layer was extracted twice with AcOEt (10 mL x 2) and the combined organic layers were washed with brine (10 mL) and dried over  $\text{Na}_2\text{SO}_4$ . After concentration in vacuo, the residue was purified by column chromatography ( $\text{SiO}_2$ , hexane/AcOEt = 3/2) to give triol **9** (88 mg, 65%, from cyclopentanone (**2f**)) as colorless prisms.

#### (*rel*-1*S*,2*R*,3*R*,1*aR*,2*aR*)-2-Hydroxy- $\alpha$ 1, $\alpha$ 2-diphenyl-1,3-cyclopentanedimethanol (**9**).

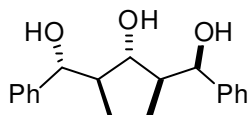

mp 136-137  $^{\circ}\text{C}$

$^1\text{H}$  NMR ( $\text{CDCl}_3$ , 400 MHz)  $\delta$  1.04-1.14 (m, 1H), 1.23-1.32 (m, 1H), 1.45-1.61 (m, 2H), 2.09-2.18 (m, 1H), 2.30 (ddd,  $J$  = 18.8, 9.2, 5.0 Hz), 2.61 (d, 1H,  $J$  = 3.6 Hz), 3.05 (s, 1H), 3.10 (s, 1H), 4.01 (t, 1H,  $J$  = 9.2 Hz), 4.48 (d, 1H,  $J$  = 9.6 Hz), 4.86-4.88 (m, 1H), 7.24-7.37 (m, 10H).

$^{13}\text{C}$  NMR ( $\text{CDCl}_3$ , 100 MHz)  $\delta$  21.68, 23.85, 52.51, 52.71, 74.44, 79.14, 80.49, 126.30, 126.42, 127.52, 127.91,



128.37, 128.45, 142.95, 143.30.

IR (KBr)  $\nu$  3302  $\text{cm}^{-1}$ .

LR-FABMS ( $\text{CHCl}_3 + \text{NBA} + \text{NaI}$ ) 321 ( $(\text{M} + \text{Na})^+$ ), 263, 245, 176, 154 (bp), 136, 107, 69.

HR-FABMS calcd for  $\text{C}_{19}\text{H}_{22}\text{O}_3\text{Na}$  ( $(\text{M} + \text{Na})^+$ ) 321.1467, found 321.1475.

$[\alpha]_{\text{D}}^{30} +55.5$  ( $c$  1.01,  $\text{CHCl}_3$ , 99% ee)

Relative stereochemistry was determined by X-ray analysis (cf. S-26).

## 6. The Evans-Tishchenko reaction of racemic $\beta$ -hydroxy ketone (**10**).

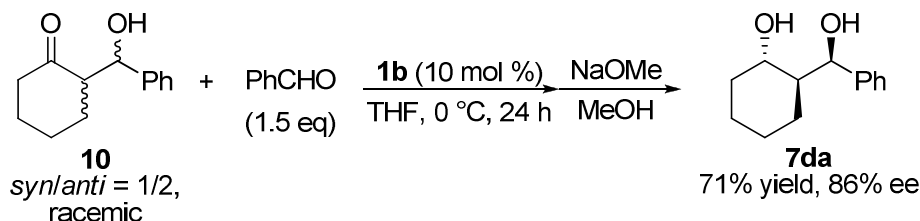

Under an argon atmosphere, *n*-BuLi (0.094 mmol, 20 mol %) in hexane (0.17 M, 0.55 mL) was added to a solution of (*R*)-3,3'-diphenylbinaphthol (20.7 mg, 0.047 mmol, 10 mol %) in THF (1 mL) at 0 °C, and the mixture was stirred for 5 min. Then benzaldehyde (**3a**) (0.07 mL, 0.07 mmol, 1.5 equiv.) and 2-(Hydroxyphenylmethyl)cyclohexanone (**10**) ( $\text{syn/anti} = 1/2$ , racemic) (96 mg, 0.47 mmol) in THF (2 mL) were successively added to the above mixture. After 24 h, the reaction was quenched with sat.  $\text{NH}_4\text{Cl}$  (2 mL) and the mixture was stirred for 5 min at rt. The aqueous layer was extracted with AcOEt and the combined organic layers were washed with brine (3 mL). After drying over  $\text{Na}_2\text{SO}_4$  and concentration in vacuo, the residue was purified by column chromatography ( $\text{SiO}_2, \text{CH}_2\text{Cl}_2$ ) to afford monoacylated diol as a colorless oil. The diol monoester was dissolved in MeOH (2 mL) and treated with NaOMe (0.05 mmol, 11 mol %) in MeOH (0.5 M, 0.1 mL) and the resulting homogeneous mixture was stirred for 3 h. The mixture was diluted with ethyl acetate (20 mL), and washed with water (5 mL). The aqueous layer was extracted twice with AcOEt (10 mL x 2) and the combined organic layers were washed with brine (10 mL) and dried over  $\text{Na}_2\text{SO}_4$ . After concentration in vacuo, the residue was purified by column chromatography ( $\text{SiO}_2$ , hexane/AcOEt = 4/1) to give diol **7da** (68 mg, 71%, 86% ee) as colorless needles.

## 7. The Evans-Tishchenko reduction of $\beta$ -hydroxy ketone (**11**).

Under an argon atmosphere, *n*-BuLi (0.094 mmol, 20 mol %) in hexane (0.17 M, 0.55 mL) was added to a solution of (*R*)-3,3'-diphenylbinaphthol (20.7 mg, 0.047 mmol, 10 mol %) in THF at -45 °C, and the mixture was stirred for 5 min. Then a solution of benzaldehyde (**3b**) (0.072 mL, 75 mg, 0.72 mmol, 1.5 equiv) and 2,2-dimethyl-3-hydroxy-1-phenylpropan-1-one (**11**) (0.073 mL, 0.47 mmol) were successively added to the above mixture. After 0.5 h, the reaction was quenched with sat.  $\text{NH}_4\text{Cl}$  aq and the mixture was stirred for 10 min at rt. The aqueous layer was extracted with AcOEt and the combined organic layer was washed with brine. After drying over  $\text{Na}_2\text{SO}_4$  and evaporating the solvent, the residue was purified by silica gel column chromatography ( $\text{SiO}_2$ ,  $\text{CH}_2\text{Cl}_2$ ) to afford the diol monoester product **12** (114 mg, 87% yield, 99% ee) as colorless prisms.

**(S)-2,2-Dimethyl-1-phenylpropane-1,3-diol 3-O-benzoate (12)<sup>3</sup>.**

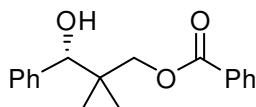

mp 73-74 °C

<sup>1</sup>H NMR (CDCl<sub>3</sub>, 400 MHz) δ 0.97 (s, 3H, -CH<sub>3</sub>), 1.04 (s, 3H, -CH<sub>3</sub>), 2.45 (brs, 1H, -OH), 4.02 (d, 1H, *J* = 11.0 Hz, BzO-CH<sub>2</sub>), 4.43 (d, 1H, *J* = 11.0 Hz, BzO-CH<sub>2</sub>), 4.69 (s, 1H, HO-CHPh), 7.25-7.48 (m, 7H, Ar-*H*), 7.56-7.60 (m, 1H, Ar-*H*), 8.04-8.06 (m, 2H, Ar-*H*).

[α]<sub>D</sub><sup>30</sup> -23.1 (*c* 1.13, CHCl<sub>3</sub>, 99% ee)

HPLC (Daicel chiralpak AD-H, Hex/IPA = 9/1, 1.0 mL/min): *t*<sub>R</sub> 8.8 (major, *S*), 12.8 (minor, *R*).

**Determination of the absolute configuration of 12.**

To a solution of **12** (114 mg) in MeOH (2 mL), NaOMe (0.05 mmol, 11 mol %) in MeOH (0.5 M, 0.1 mL) was added and the resulting homogeneous mixture was stirred for 3 h. The mixture was diluted with ethyl acetate (20 mL), and washed with water (5 mL). The aqueous layer was extracted twice with ethyl acetate (10 mL x 2) and the combined organic layers were washed with brine (10 mL) and dried over Na<sub>2</sub>SO<sub>4</sub>. After concentration in vacuo, the residue was purified by column chromatography (SiO<sub>2</sub>, hexane/ethyl acetate = 4/1) to give diol **13** (70 mg, 96%) as colorless needles. The optical rotation data shows (+)-**13** has *S*-configuration, which shows (-)-**12** has *S*-configuration.

**(S)-2,2-Dimethyl-1-phenylpropane-1,3-diol (13)<sup>4</sup>.**

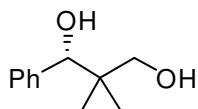

mp 62-63 °C

<sup>1</sup>H NMR (CDCl<sub>3</sub>, 400 MHz) δ 0.79 (s, 3H), 0.84 (s, 3H), 3.43 (d, 1H, *J* = 10.6 Hz), 3.50-3.58 (m, 2H), 3.77 (brs, 1H), 4.57 (s, 1H), 7.32-7.35 (m, 5H).

[α]<sub>D</sub><sup>30</sup> +44.7 (*c* 1.00, CHCl<sub>3</sub>, 99% ee), [lit. 4: [α]<sub>D</sub><sup>30</sup> +21.7 (*c* 1.17, CHCl<sub>3</sub>, 55% ee, *S*)]

**8. References**

- (1) Mlynarski, J.; Rakiei, B.; Stodulski, M.; Suszczyńska, A.; Frelek, J. *Chem. Eur. J.* **2006**, *12*, 8158-8167.
- (2) Acetti, D.; Brenna, E.; Fuganti, C.; Gatti, F. G.; Serra, S. *Eur. J. Org. Chem.* **2010**, 142-151.
- (3) Markert, M.; Mahrwald, R. *Synthesis* **2004**, 1429-1433.
- (4) Kotani, S.; Shimoda, Y.; Sugiura, M.; Nakajima, M. *Tetrahedron Lett.* **2009**, *50*, 4602-4605.

## 9. $^1\text{H}$ NMR and HPLC chart of the Tishchenko products

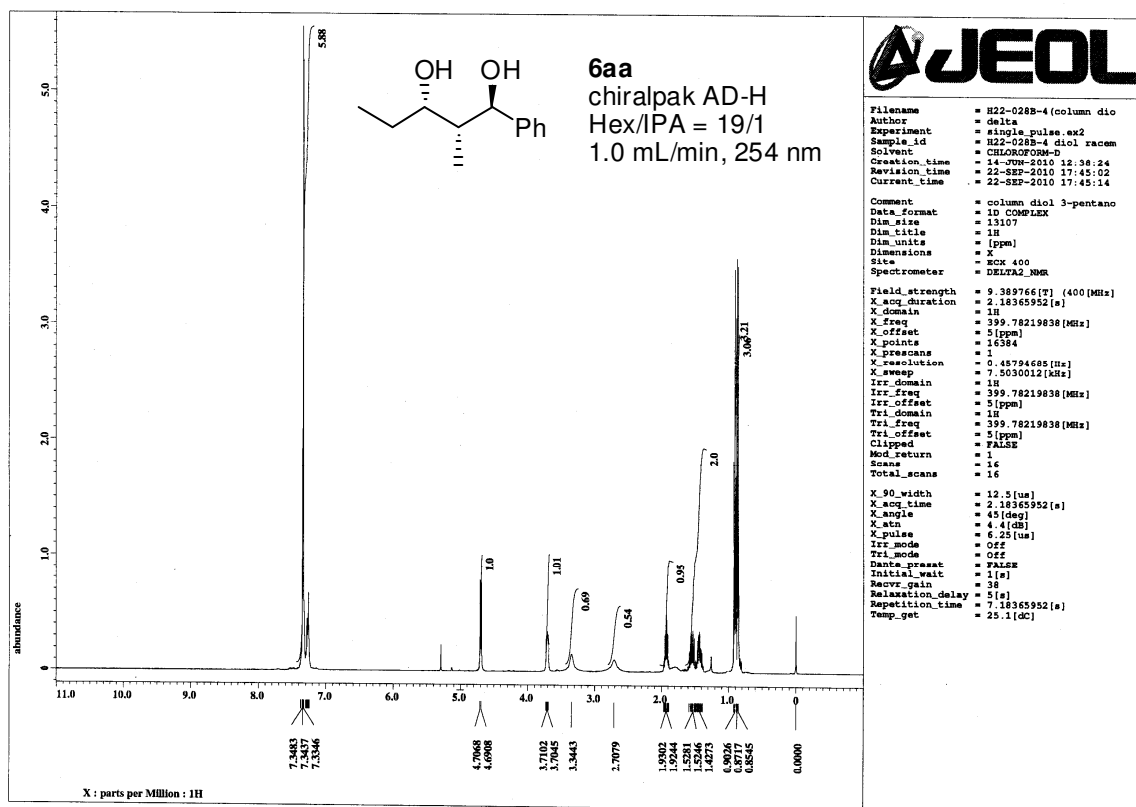

### 1. racemic

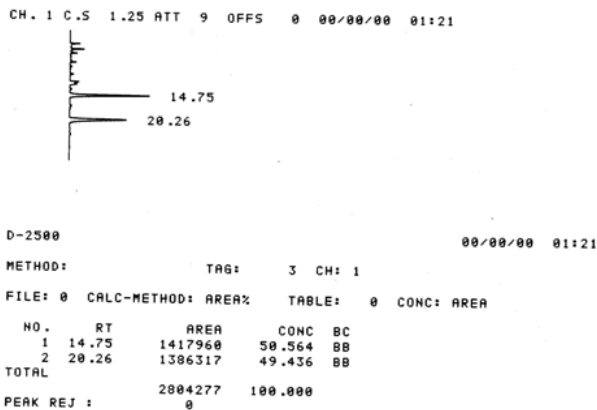

### 2. Optically active (93% ee)

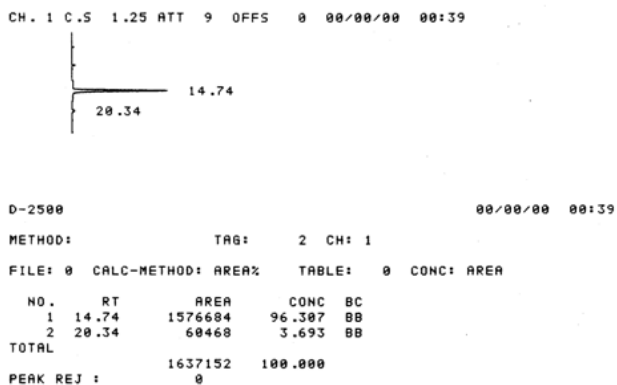

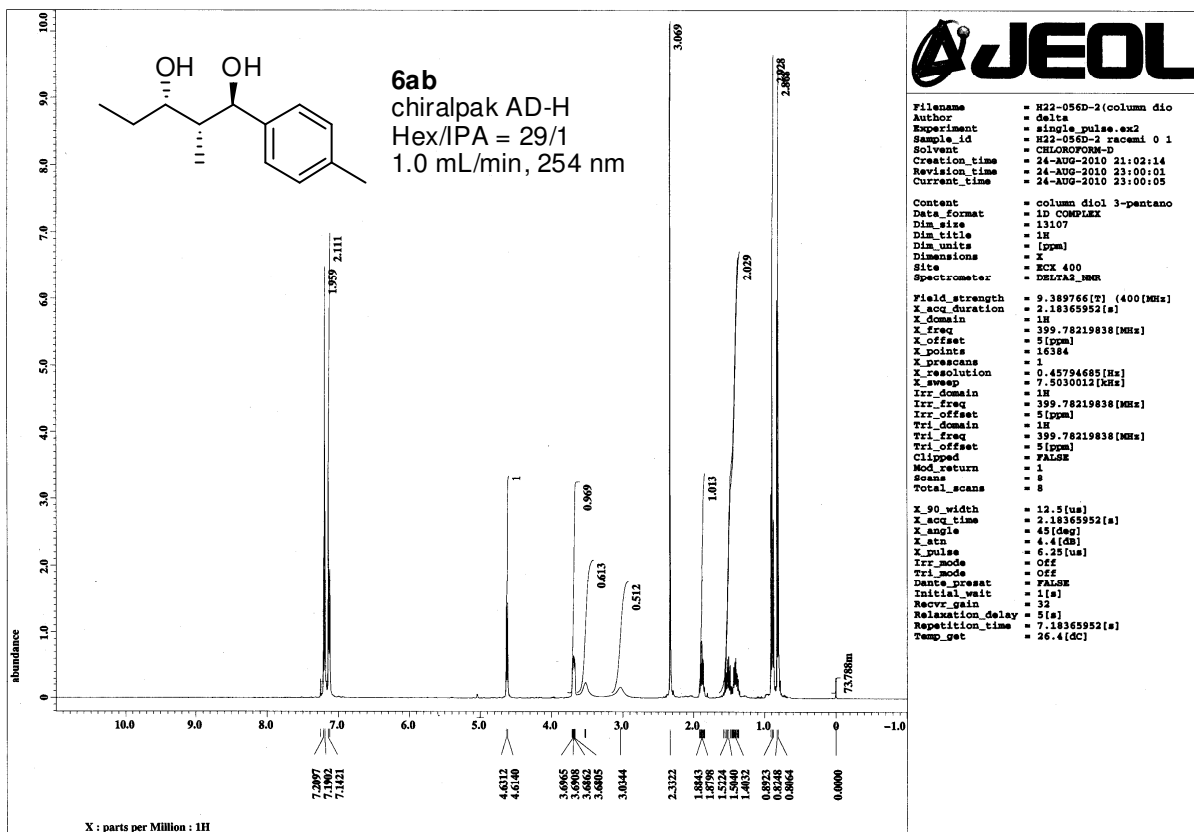

## 1. racemic

CH. 1 C.5 1.25 ATT 8 OFFS 0 00/00/00 02:43

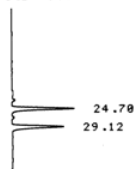

D-2500 00/00/00 02:43

METHOD: TAG: 9 CH: 1  
FILE: 0 CALC-METHOD: AREA% TABLE: 0 CONC: AREA

| NO.   | RT    | AREA    | CONC    | BC |
|-------|-------|---------|---------|----|
| 1     | 24.70 | 1068734 | 50.225  | BB |
| 2     | 29.12 | 1059139 | 49.775  | BB |
| TOTAL |       | 2127873 | 100.000 |    |

PEAK REJ : 0

## 2. Optically active (95% ee)

CH. 1 C.5 1.25 ATT 8 OFFS 0 00/00/00 03:31

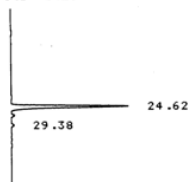

D-2500 00/00/00 03:31

METHOD: TAG: 10 CH: 1  
FILE: 0 CALC-METHOD: AREA% TABLE: 0 CONC: AREA

| NO.   | RT    | AREA    | CONC    | BC |
|-------|-------|---------|---------|----|
| 1     | 24.62 | 2116635 | 97.333  | BB |
| 2     | 29.38 | 58804   | 2.667   | BB |
| TOTAL |       | 2174639 | 100.000 |    |

PEAK REJ : 0



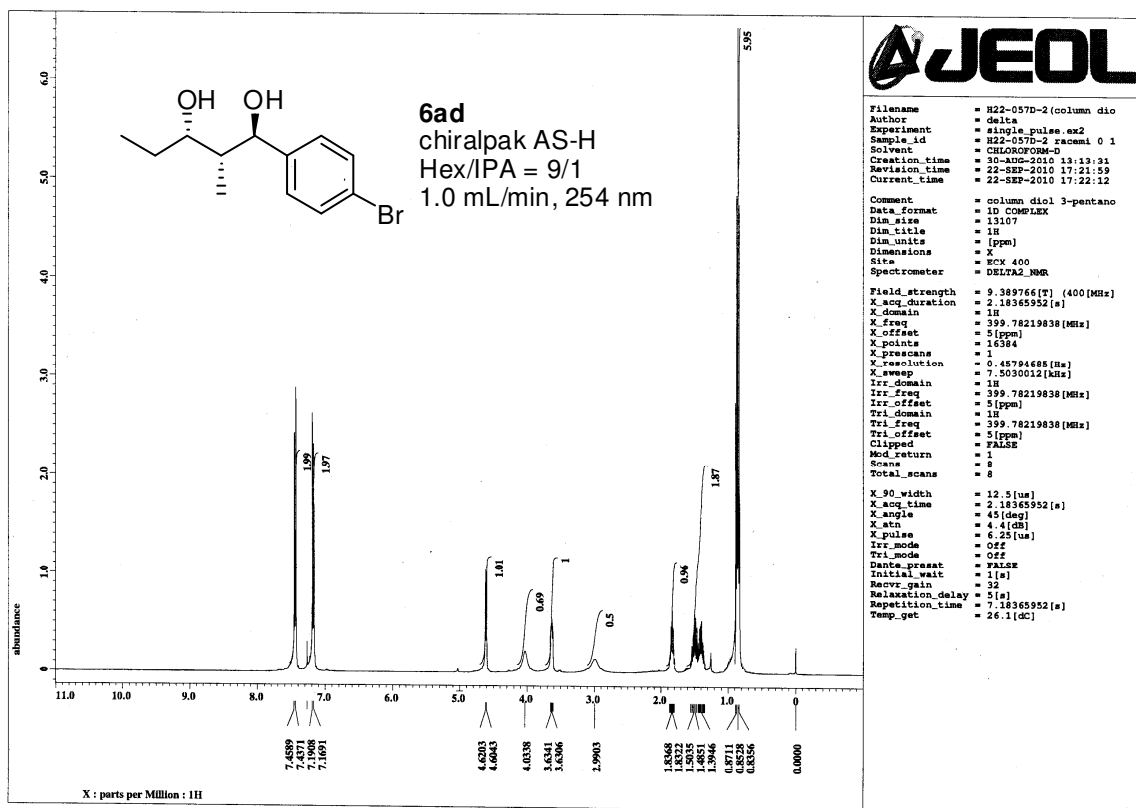

## 1. racemic

CH. 1 C.S 1.25 ATT 9 OFFS 0 00/00/00 04:40

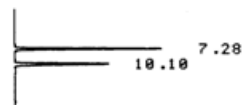

D-2500

00/00/00 04:40

METHOD: TAG: 3 CH: 1

FILE: 0 CALC-METHOD: AREA% TABLE: 0 CONC: AREA

| NO. | RT    | AREA    | CONC   | BC |
|-----|-------|---------|--------|----|
| 1   | 7.28  | 1222132 | 49.768 | BB |
| 2   | 10.10 | 1233505 | 50.232 | BB |

TOTAL 2455637 100.000  
PEAK REJ : 1000

## 2. Optically active (88% ee)

CH. 1 C.S 1.25 ATT 10 OFFS 0 00/00/00 05:08

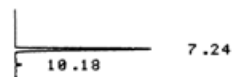

D-2500

00/00/00 05:08

METHOD: TAG: 4 CH: 1

FILE: 0 CALC-METHOD: AREA% TABLE: 0 CONC: AREA

| NO. | RT    | AREA    | CONC   | BC |
|-----|-------|---------|--------|----|
| 1   | 7.24  | 2374366 | 93.958 | BB |
| 2   | 10.18 | 152685  | 6.042  | BB |

TOTAL 2527051 100.000  
PEAK REJ : 0

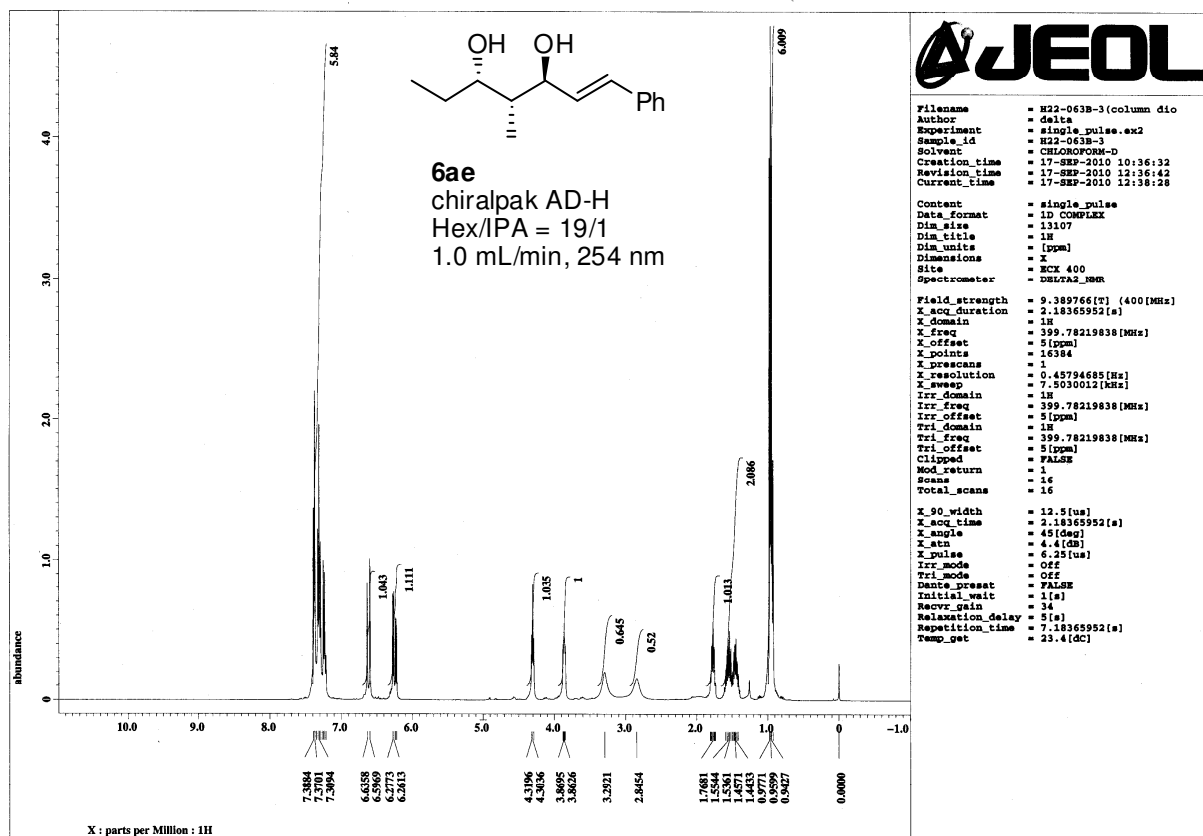

## 1. racemic

CH. 1 C.S 1.25 ATT 10 OFFS 0 00/00/00 04:30

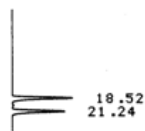

D-2500

00/00/00 04:30

METHOD: TAG: 5 CH: 1

FILE: 0 CALC-METHOD: AREA% TABLE: 0 CONC: AREA

| NO. | RT    | AREA    | CONC   | BC |
|-----|-------|---------|--------|----|
| 1   | 18.52 | 2631584 | 50.737 | BB |
| 2   | 21.24 | 2555151 | 49.263 | BB |

TOTAL 5186735 100.000

PEAK REJ : 0

## 2. Optically active (94% ee)

CH. 1 C.S 1.25 ATT 10 OFFS 0 00/00/00 05:05

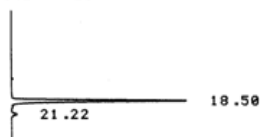

D-2500

00/00/00 05:05

METHOD: TAG: 6 CH: 1

FILE: 0 CALC-METHOD: AREA% TABLE: 0 CONC: AREA

| NO. | RT    | AREA    | CONC   | BC |
|-----|-------|---------|--------|----|
| 1   | 18.50 | 7347759 | 97.071 | BB |
| 2   | 21.22 | 221718  | 2.929  | BB |

TOTAL 7569477 100.000

PEAK REJ : 0





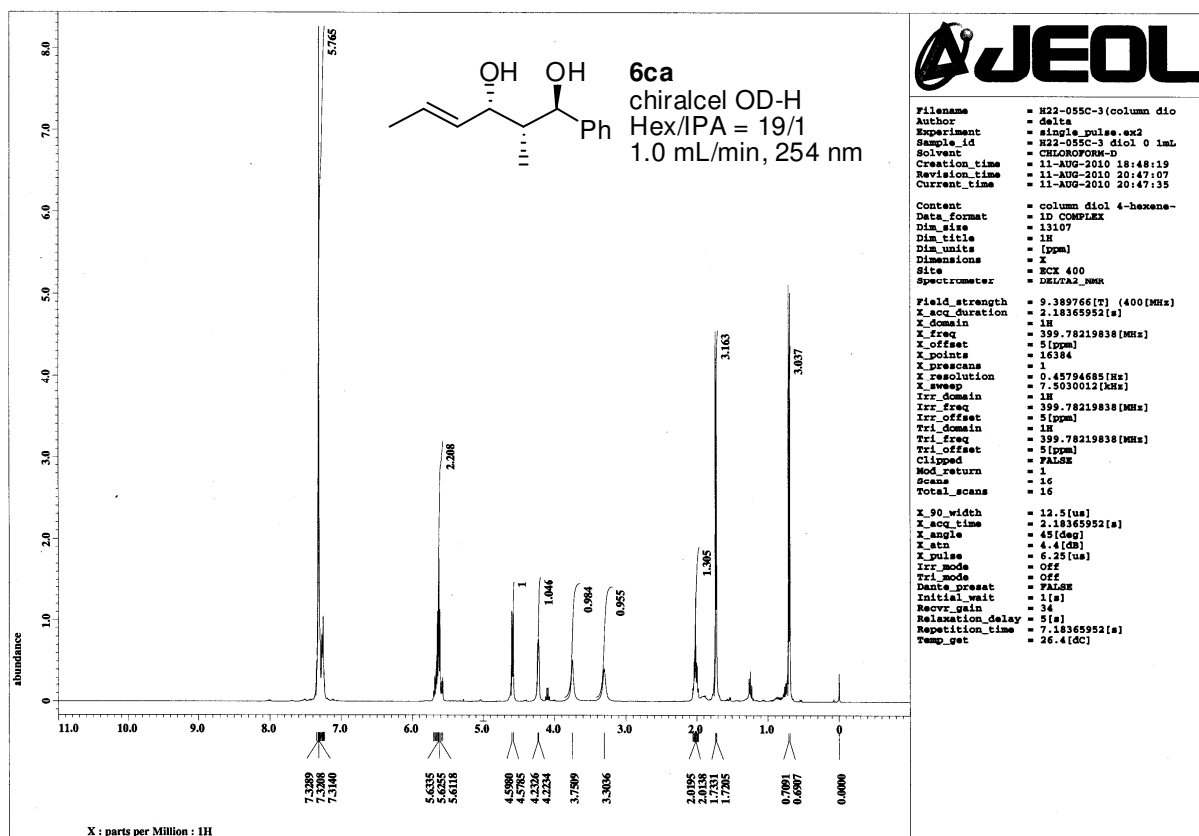

## 1. racemic

CH. 1 C.S 1.25 ATT 6 OFFS 0 00/00/00 00:35

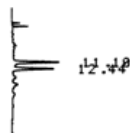

D-2500

00/00/00 00:35

METHOD: TAG: 3 CH: 1

FILE: 0 CALC-METHOD: AREA% TABLE: 0 CONC: AREA

| NO. | RT    | AREA  | CONC   | BC |
|-----|-------|-------|--------|----|
| 1   | 11.10 | 96360 | 50.426 | BU |
| 2   | 12.44 | 94731 | 49.574 | UB |

TOTAL 191091 100.000

PEAK REJ : 0

## 2. Optically active (87% ee)

CH. 1 C.S 1.25 ATT 9 OFFS 0 00/00/00 01:06

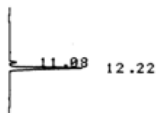

D-2500

00/00/00 01:06

METHOD: TAG: 4 CH: 1

FILE: 0 CALC-METHOD: AREA% TABLE: 0 CONC: AREA

| NO. | RT    | AREA    | CONC   | BC |
|-----|-------|---------|--------|----|
| 1   | 11.08 | 110640  | 6.659  | BU |
| 2   | 12.22 | 1550904 | 93.341 | UB |

TOTAL 1661544 100.000

PEAK REJ : 0

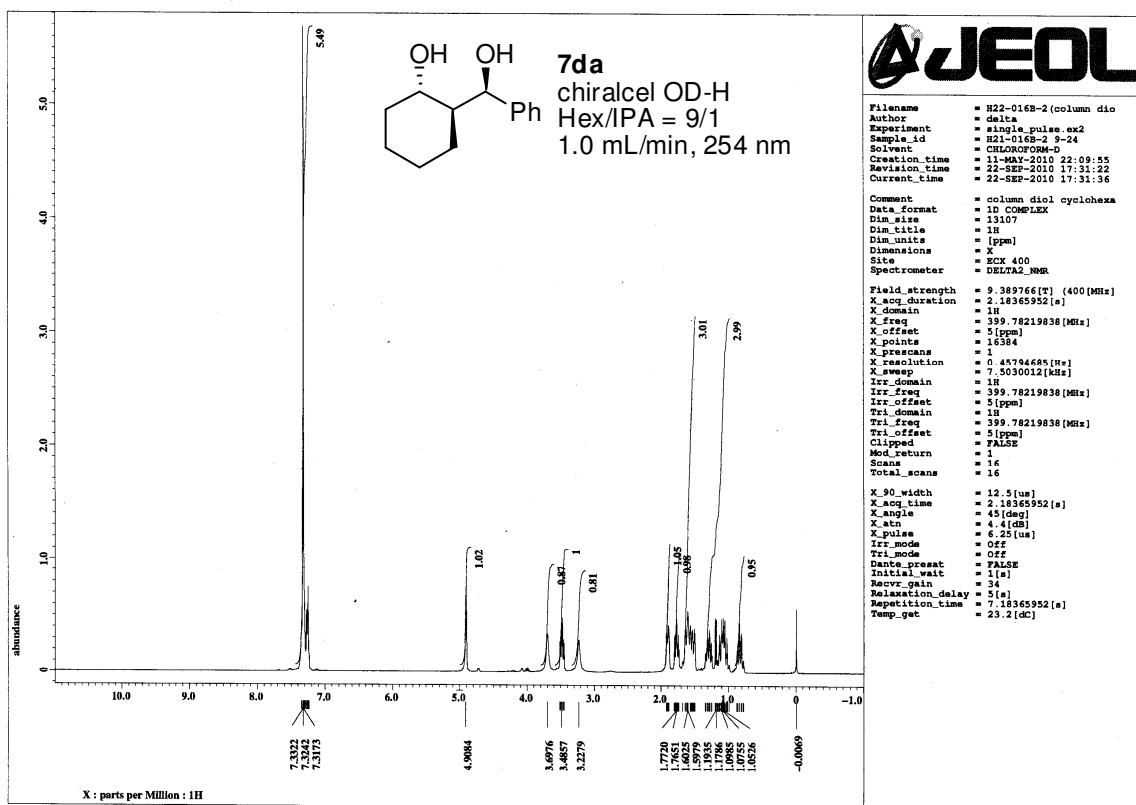

## 1. racemic

CH. 1 C.S 1.25 ATT 8 OFFS 0 00/00/00 05:18

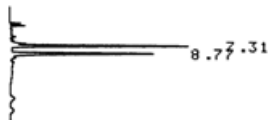

D-2500

00/00/00 05:18

METHOD: TAG: 5 CH: 1

FILE: 0 CALC-METHOD: AREA% TABLE: 0 CONC: AREA

| NO. | RT   | AREA   | CONC   | BC |
|-----|------|--------|--------|----|
| 1   | 7.31 | 895968 | 48.488 | BB |
| 2   | 8.77 | 954886 | 51.592 | BB |

TOTAL 1850854 100.000

PEAK REJ : 0

## 2. Optically active (90% ee)

CH. 1 C.S 1.25 ATT 9 OFFS 0 00/00/00 06:39

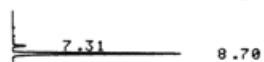

D-2500

00/00/00 06:39

METHOD: TAG: 8 CH: 1

FILE: 0 CALC-METHOD: AREA% TABLE: 0 CONC: AREA

| NO. | RT   | AREA    | CONC   | BC |
|-----|------|---------|--------|----|
| 1   | 7.31 | 131929  | 5.196  | BB |
| 2   | 8.70 | 2407024 | 94.804 | BB |

TOTAL 2538953 100.000

PEAK REJ : 0

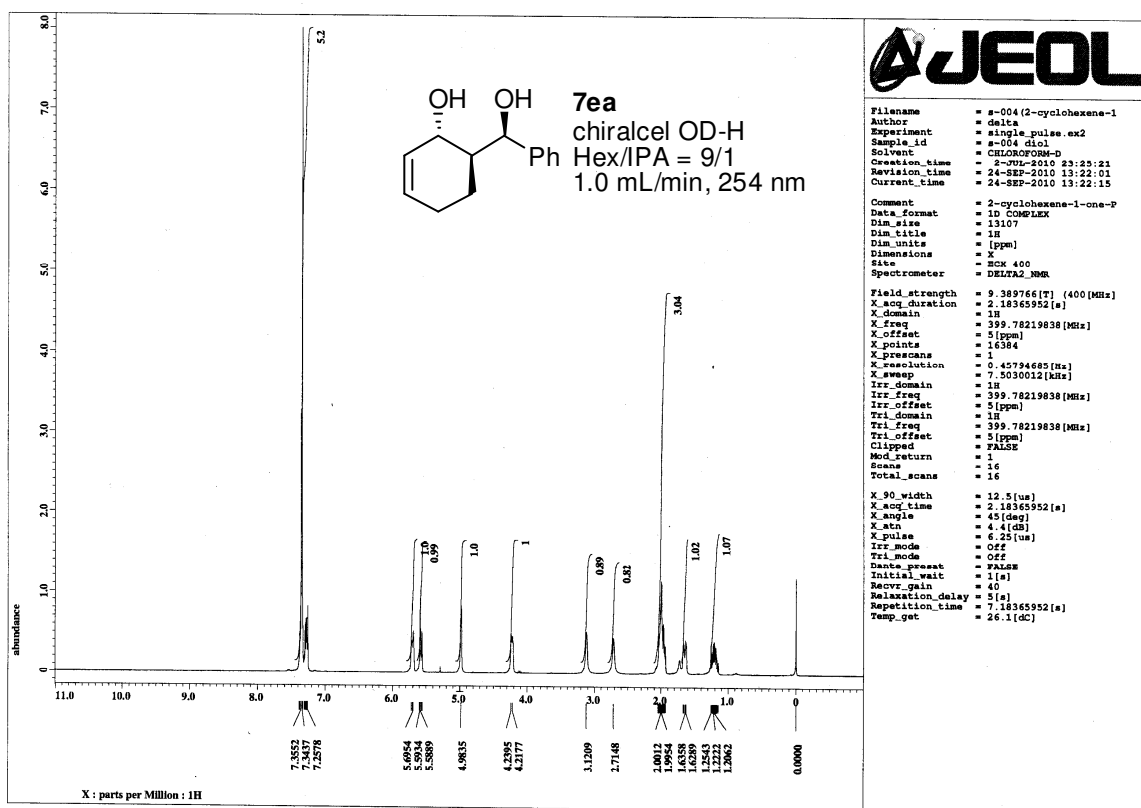

## 1. racemic

C-RSA CHROMATOPAC CH=1 Report No.=1 DATA=1:9CHRM1.C00 10/07/03 16:05:08

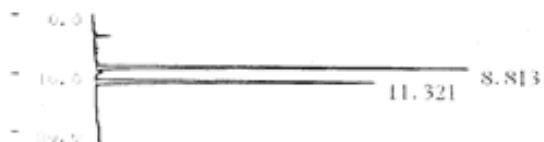

### \*\* CALCULATION REPORT \*\*

| CH    | PKNO | TIME   | AREA    | HEIGHT | MK | IDNO | CONC    | NAME |
|-------|------|--------|---------|--------|----|------|---------|------|
| 1     | 5    | 8.813  | 514429  | 29048  |    |      | 50.6305 |      |
|       | 7    | 11.321 | 501617  | 21850  |    |      | 49.3695 |      |
| TOTAL |      |        | 1016046 | 50898  |    |      | 100     |      |

C-RSA CHROMATOPAC CH=1 Report No.=2 DATA=1:9CHRM1.C00 10/07/03 16:05:08

## 2. Optically active (85% ee)

C-RSA CHROMATOPAC CH=1 Report No.=3 DATA=1:9CHRM1.C00 10/07/03 16:33:52

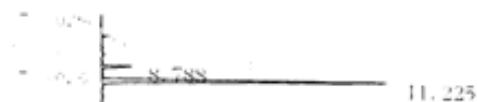

### \*\* CALCULATION REPORT \*\*

| CH    | PKNO | TIME   | AREA    | HEIGHT | MK | IDNO | CONC    | NAME |
|-------|------|--------|---------|--------|----|------|---------|------|
| 1     | 10   | 8.788  | 176262  | 9414   |    |      | 7.6033  |      |
|       | 12   | 11.225 | 2111978 | 89015  |    |      | 92.3967 |      |
| TOTAL |      |        | 2318240 | 98429  |    |      | 100     |      |

C-RSA CHROMATOPAC CH=1 Report No.=4 DATA=1:9CHRM1.C00 10/07/03 16:33:52



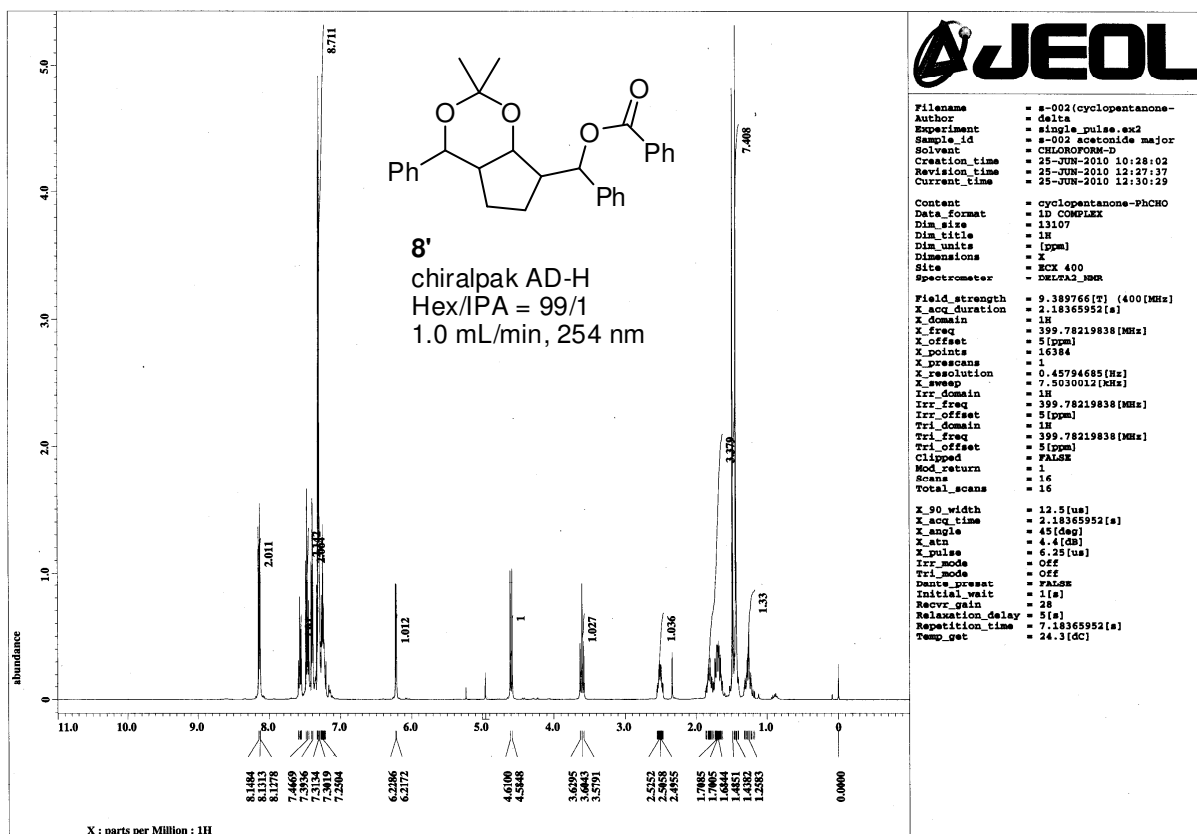

## 1. racemic

C-R8A CHROMATOPAC CH=1 Report No.=4 DATA=1:CHRM1.C00 10/07/06 16:58:00

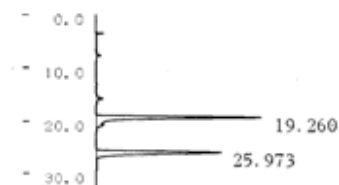

### \*\* CALCULATION REPORT \*\*

| CH    | PKNO | TIME   | AREA    | HEIGHT | MK | IDNO | CONC    | NAME |
|-------|------|--------|---------|--------|----|------|---------|------|
| 1     | 11   | 19.26  | 1824768 | 57678  | S  |      | 52.5699 |      |
|       | 13   | 25.973 | 1646356 | 43834  |    |      | 47.43   |      |
| TOTAL |      |        | 3471124 | 101512 |    |      | 100     |      |

C-R8A CHROMATOPAC CH=1 Report No.=5 DATA=1:CHRM1.C00 10/07/06 16:58:00

## 2. Optically active (98% ee)

C-R8A CHROMATOPAC CH=1 Report No.=7 DATA=1:CHRM1.C00 10/07/06 17:33:20

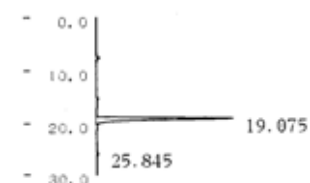

### \*\* CALCULATION REPORT \*\*

| CH    | PKNO | TIME   | AREA    | HEIGHT | MK | IDNO | CONC    | NAME |
|-------|------|--------|---------|--------|----|------|---------|------|
| 1     | 2    | 19.075 | 2880774 | 96253  |    |      | 99.1032 |      |
|       | 4    | 25.845 | 26068   | 829    |    |      | 0.8968  |      |
| TOTAL |      |        | 2906842 | 97082  |    |      | 100     |      |

C-R8A CHROMATOPAC CH=1 Report No.=8 DATA=1:CHRM1.C00 10/07/06 17:33:20

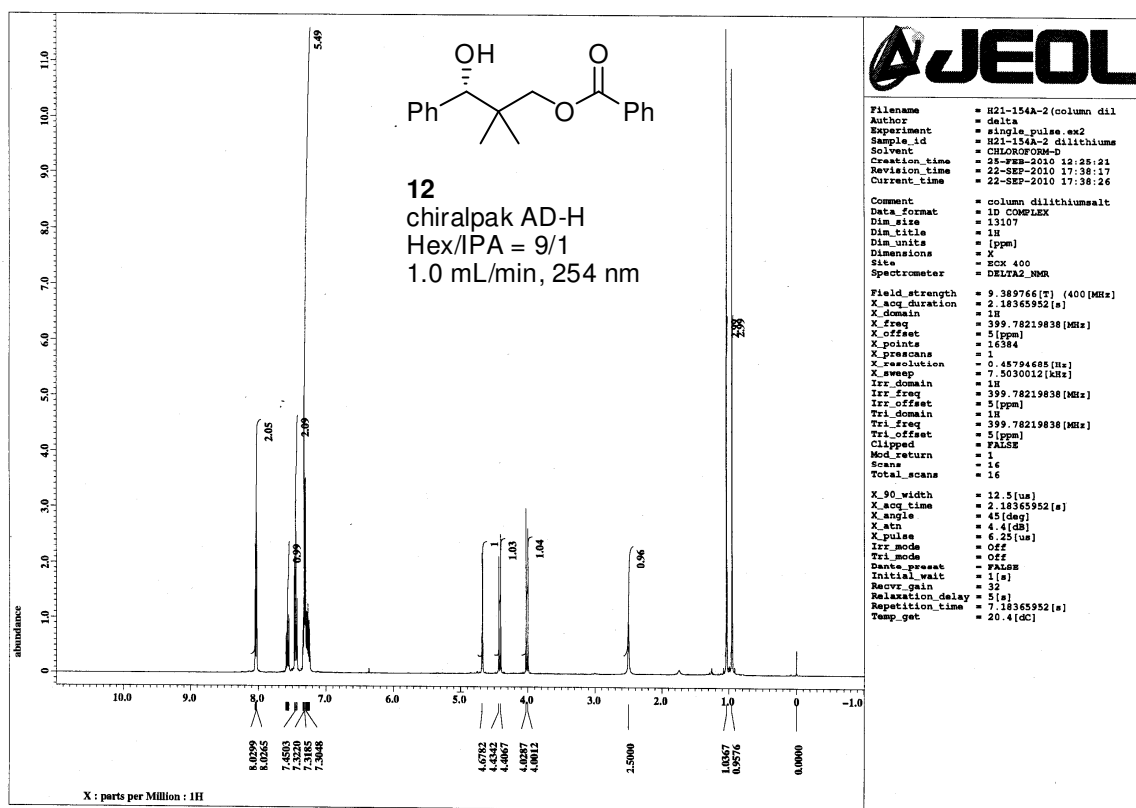

## 1. racemic

CH. 1 C.S 1.25 ATT 9 OFFS 0 00/00/00 00:24

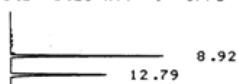

D-2500

00/00/00 00:24

METHOD: TAG: 1 CH: 1

FILE: 0 CALC-METHOD: AREA% TABLE: 0 CONC: AREA

| NO. | RT    | AREA    | CONC   | BC |
|-----|-------|---------|--------|----|
| 1   | 8.92  | 1504635 | 51.702 | BB |
| 2   | 12.79 | 1405558 | 48.298 | BB |

TOTAL 2910193 100.000

PEAK REJ : 0

## 2. Optically active (99% ee)

CH. 1 C.S 1.25 ATT 10 OFFS 0 00/00/00 00:55

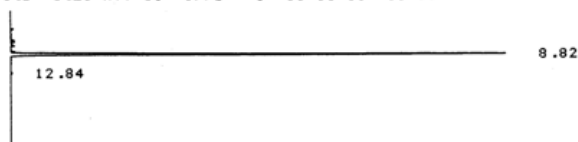

D-2500

00/00/00 00:55

METHOD: TAG: 2 CH: 1

FILE: 0 CALC-METHOD: AREA% TABLE: 0 CONC: AREA

| NO. | RT    | AREA     | CONC   | BC |
|-----|-------|----------|--------|----|
| 1   | 8.82  | 11095356 | 99.530 | BB |
| 2   | 12.84 | 52369    | 0.470  | BB |

TOTAL 11147725 100.000

PEAK REJ : 0

# 10. $^{13}\text{C}$ NMR chart of new compounds

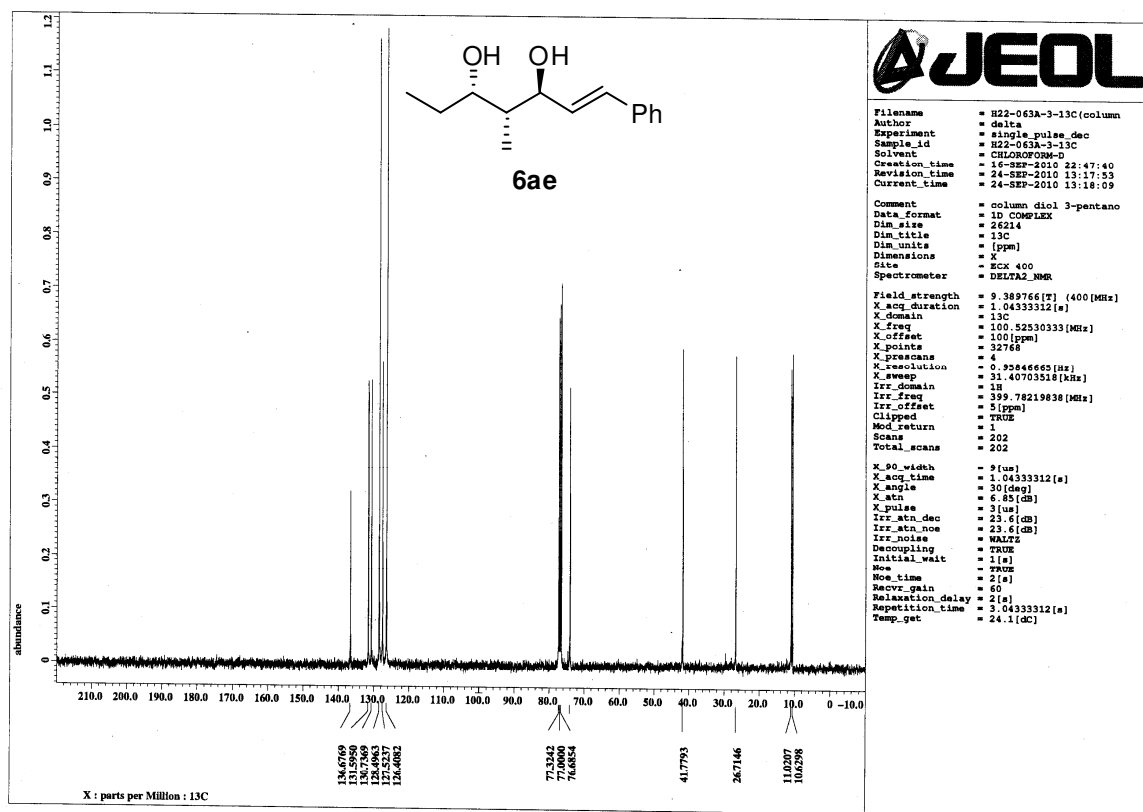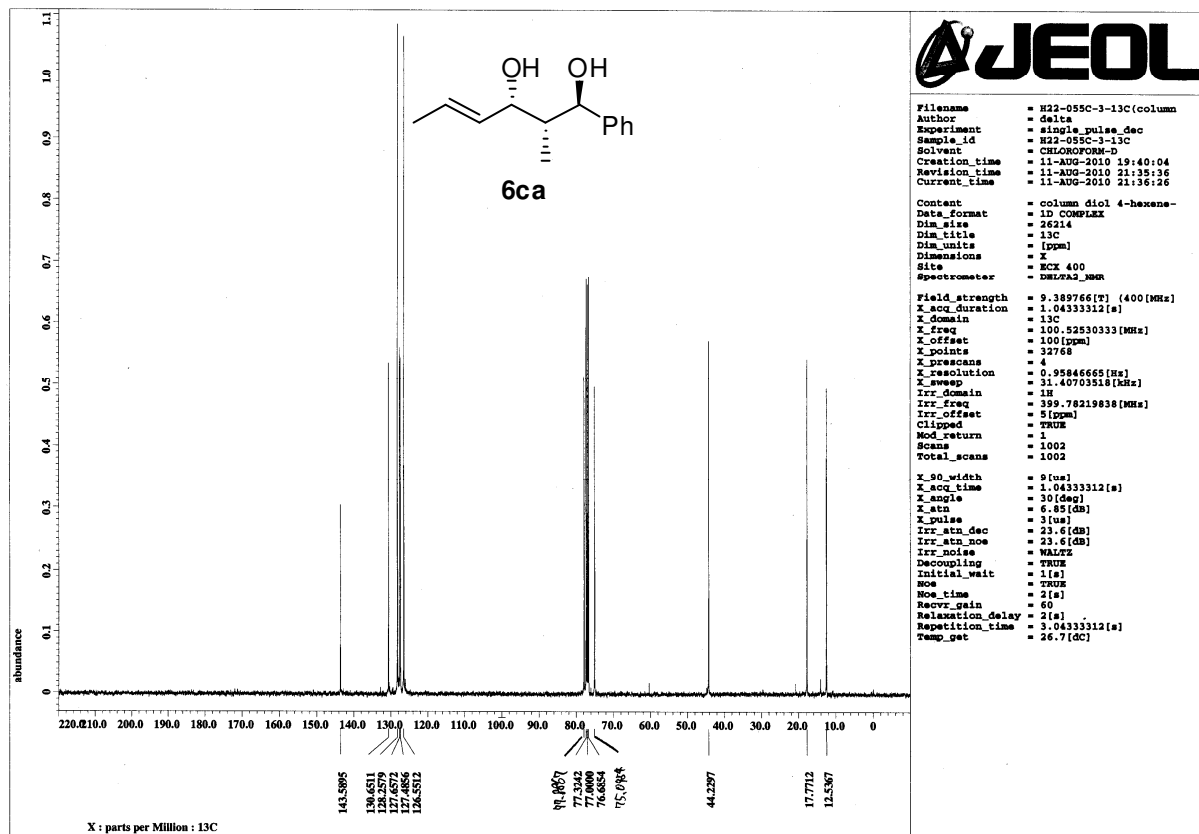

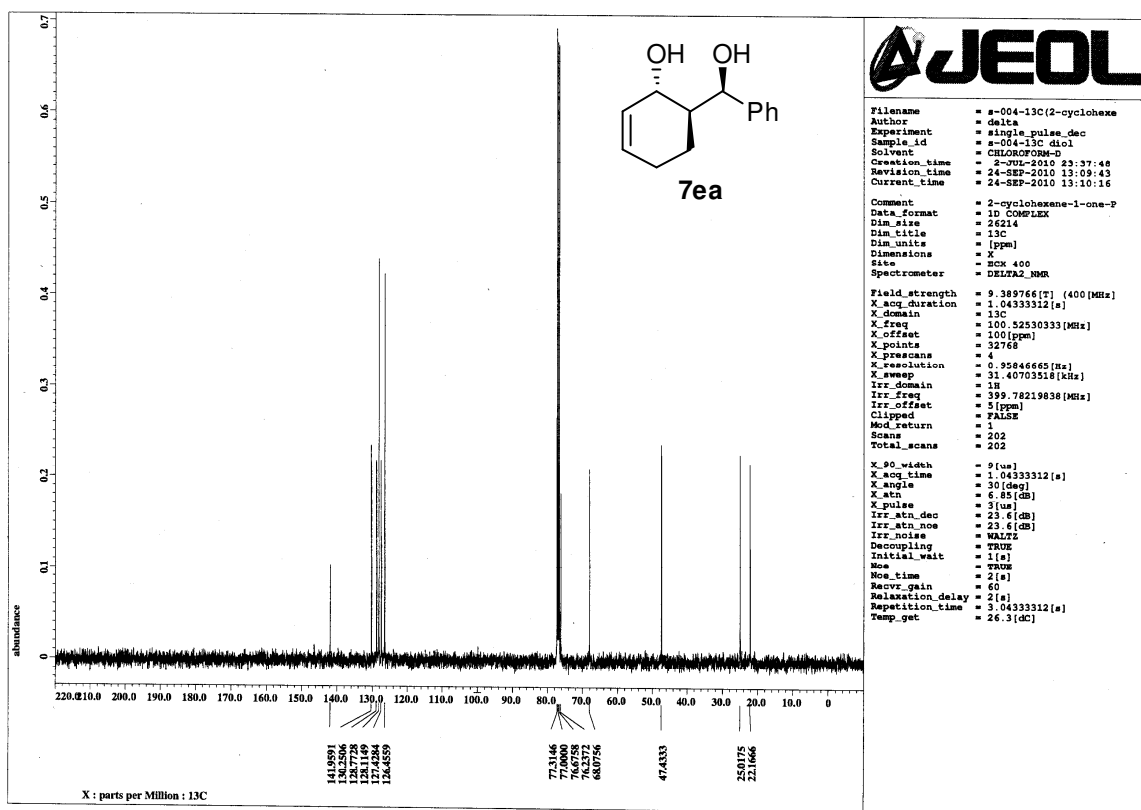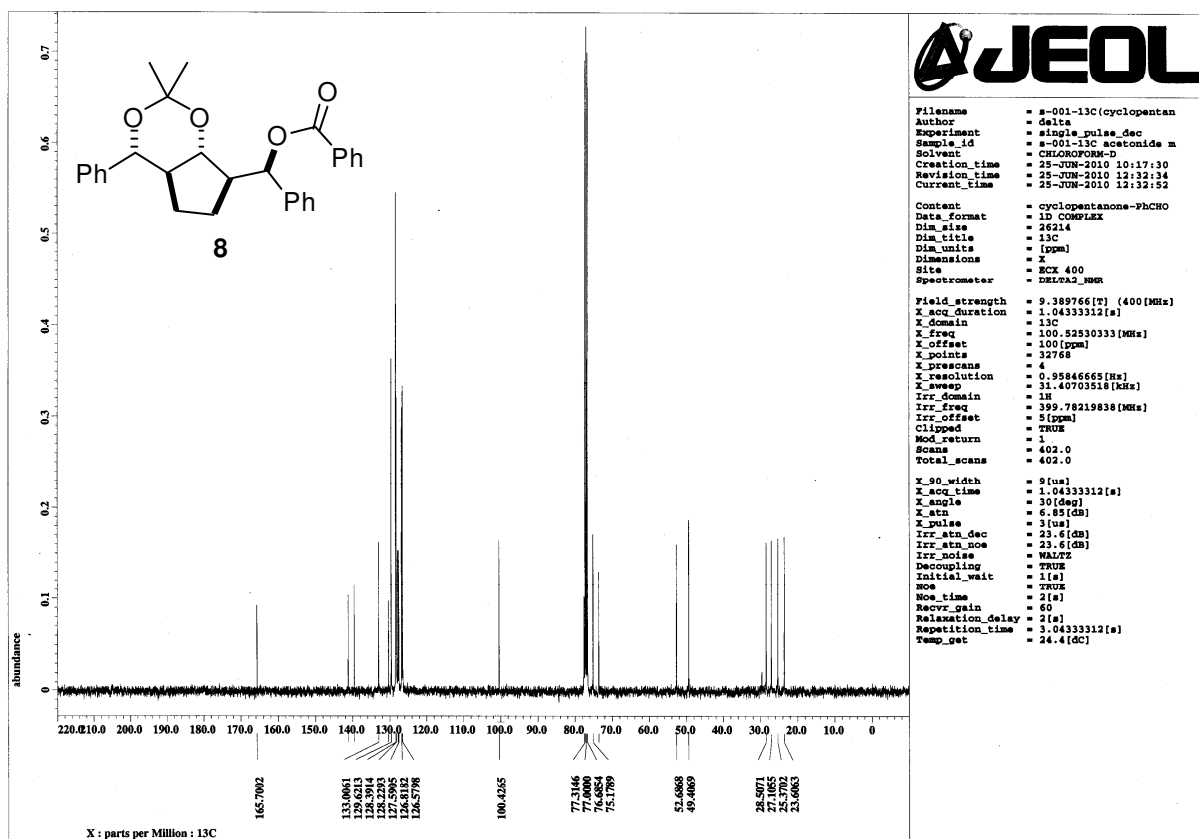



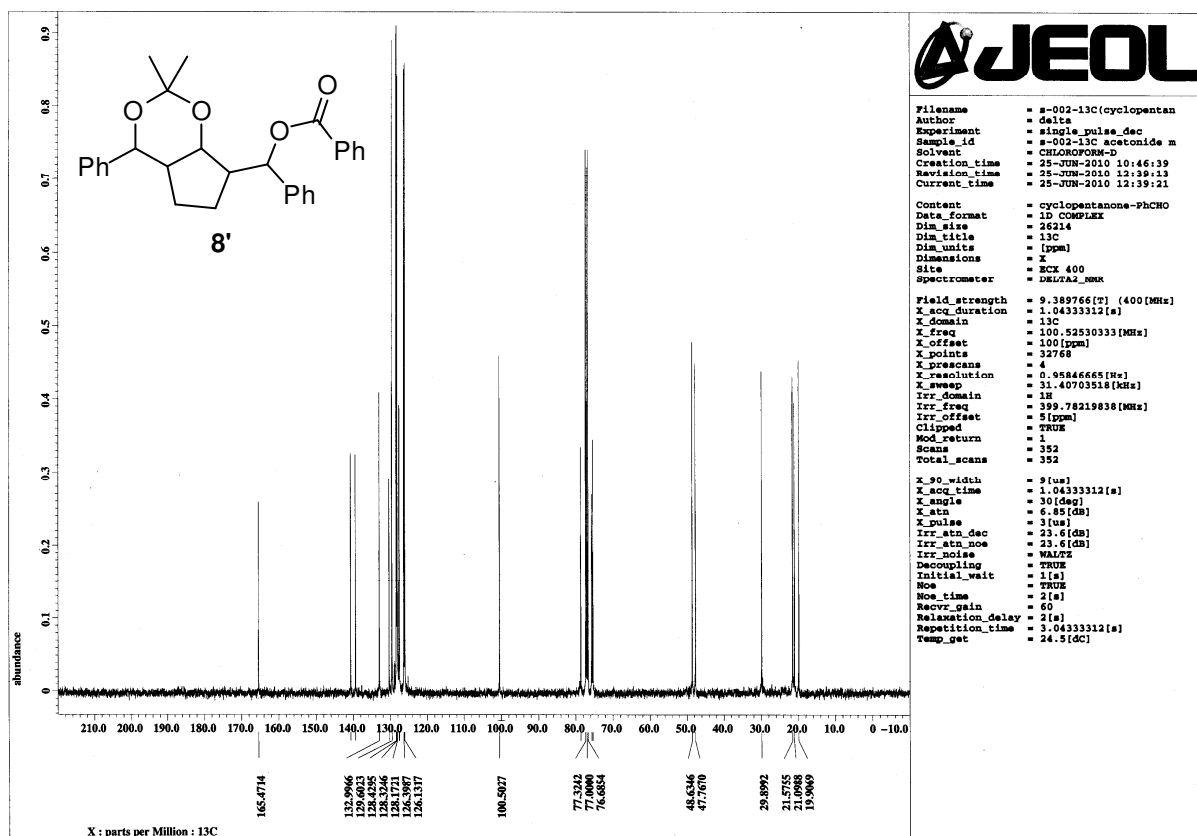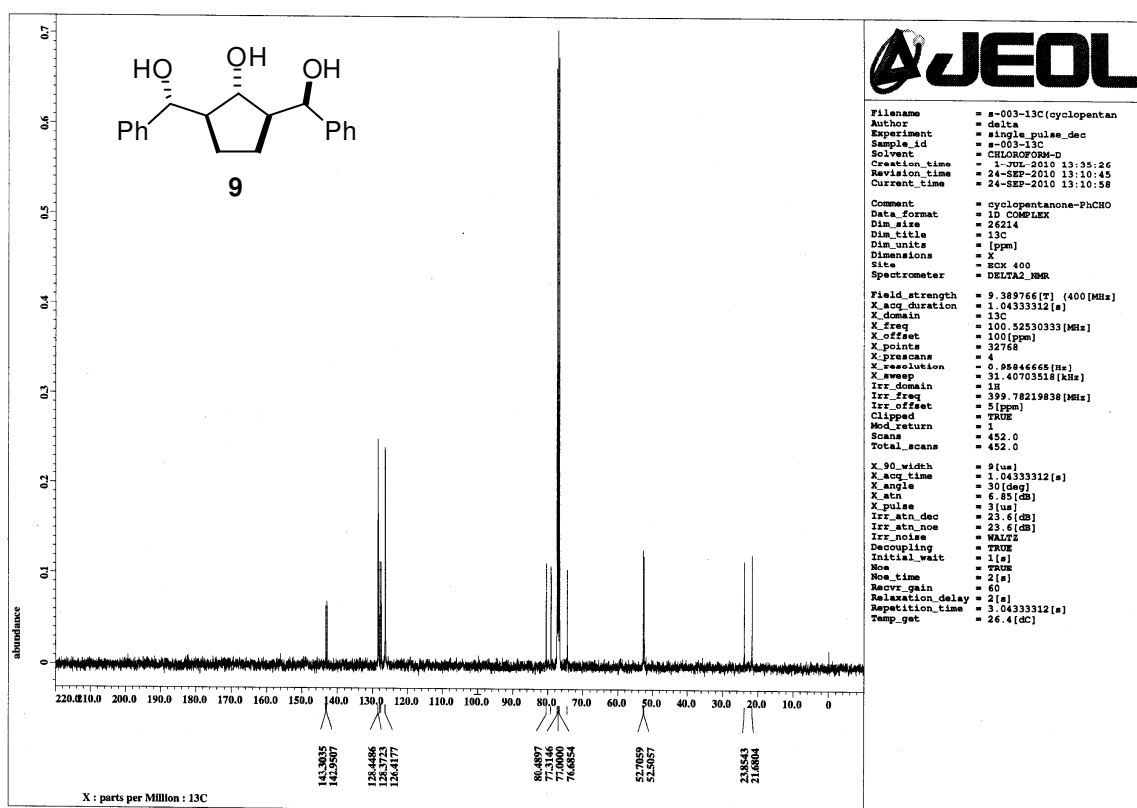

## 11. $^1\text{H}$ NMR and X-ray structure report for 14

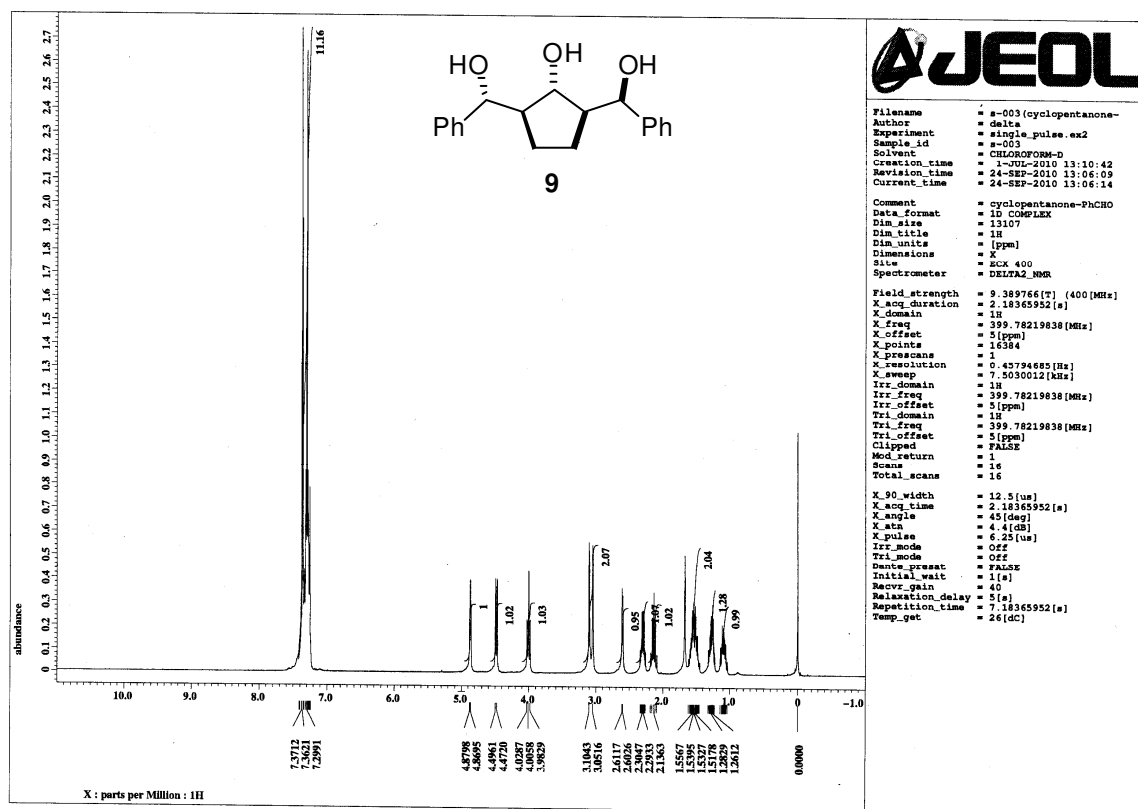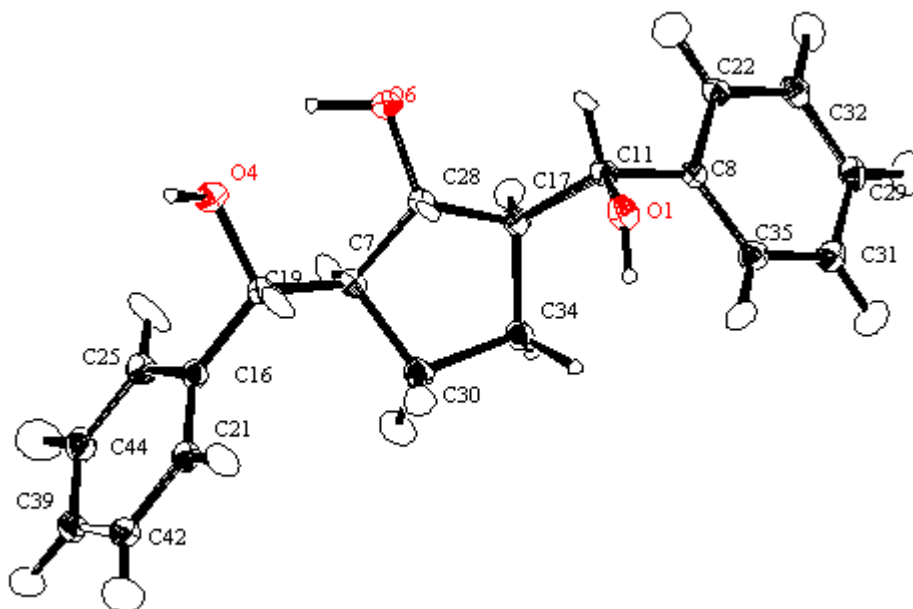

### **A. Crystal Data**

|                      |                                                                                                                                                                 |
|----------------------|-----------------------------------------------------------------------------------------------------------------------------------------------------------------|
| Empirical Formula    | C <sub>19</sub> H <sub>22</sub> O <sub>3</sub>                                                                                                                  |
| Formula Weight       | 298.38                                                                                                                                                          |
| Crystal Color, Habit | colorless, prism                                                                                                                                                |
| Crystal Dimensions   | 0.30 X 0.30 X 0.30 mm                                                                                                                                           |
| Crystal System       | triclinic                                                                                                                                                       |
| Lattice Type         | Primitive                                                                                                                                                       |
| Indexing Images      | 3 oscillations @ 60.0 seconds                                                                                                                                   |
| Detector Position    | 127.40 mm                                                                                                                                                       |
| Pixel Size           | 0.100 mm                                                                                                                                                        |
| Lattice Parameters   | a = 5.652(8) Å<br>b = 13.457(8) Å<br>c = 21.67(2) Å<br>$\alpha$ = 82.23(4) °<br>$\beta$ = 89.71(13) °<br>$\gamma$ = 77.94(5) °<br>V = 1596.3(30) Å <sup>3</sup> |
| Space Group          | P-1 (#2)                                                                                                                                                        |
| Z value              | 4                                                                                                                                                               |
| D <sub>calc</sub>    | 1.241 g/cm <sup>3</sup>                                                                                                                                         |
| F <sub>000</sub>     | 640.00                                                                                                                                                          |
| m(MoK $\alpha$ )     | 0.825 cm <sup>-1</sup>                                                                                                                                          |

### **B. Intensity Measurements**

|                                                           |                                                                       |
|-----------------------------------------------------------|-----------------------------------------------------------------------|
| Diffractometer                                            | Rigaku RAXIS-RAPID                                                    |
| Radiation                                                 | MoK $\alpha$ ( $\lambda$ = 0.71075 Å)<br>graphite monochromated       |
| Detector Aperture                                         | 280 mm x 256 mm                                                       |
| Data Images                                               | 44 exposures                                                          |
| $\omega$ oscillation Range ( $\chi$ =45.0, $\phi$ =0.0)   | 130.0 - 190.0°                                                        |
| Exposure Rate                                             | 50.0 sec./°                                                           |
| $\omega$ oscillation Range ( $\chi$ =45.0, $\phi$ =180.0) | 0.0 - 160.0°                                                          |
| Exposure Rate                                             | 50.0 sec./°                                                           |
| Detector Position                                         | 127.40 mm                                                             |
| Pixel Size                                                | 0.100 mm                                                              |
| 2 $\theta$ <sub>max</sub>                                 | 54.9°                                                                 |
| No. of Reflections Measured                               | Total: 15503<br>Unique: 7125 ( $R_{\text{int}}$ = 0.033)              |
| Corrections                                               | Lorentz-polarization<br>Absorption<br>(trans. factors: 0.723 - 0.976) |

### **C. Structure Solution and Refinement**

|                                        |                                                                                                                       |
|----------------------------------------|-----------------------------------------------------------------------------------------------------------------------|
| Structure Solution                     | Direct Methods (SIR92)                                                                                                |
| Refinement                             | Full-matrix least-squares on F <sup>2</sup>                                                                           |
| Function Minimized                     | $\sum w (F_o^2 - F_c^2)^2$                                                                                            |
| Least Squares Weights                  | 1/[0.0017F <sub>o</sub> <sup>2</sup> +1.0000 $\sigma$ (F <sub>o</sub> <sup>2</sup> )]/(4F <sub>o</sub> <sup>2</sup> ) |
| 2 $\theta$ <sub>max</sub> cutoff       | 54.9°                                                                                                                 |
| Anomalous Dispersion                   | All non-hydrogen atoms                                                                                                |
| No. Observations (I>2.00 $\sigma$ (I)) | 6992                                                                                                                  |
| No. Variables                          | 441                                                                                                                   |
| Reflection/Parameter Ratio             | 15.85                                                                                                                 |
| Residuals: R1 (I>2.00 $\sigma$ (I))    | 0.0446                                                                                                                |
| Residuals: wR2 (I>2.00 $\sigma$ (I))   | 0.1180                                                                                                                |
| Goodness of Fit Indicator              | 1.006                                                                                                                 |
| Max Shift/Error in Final Cycle         | 0.000                                                                                                                 |
| Maximum peak in Final Diff. Map        | 0.33 e <sup>-</sup> /Å <sup>3</sup>                                                                                   |
| Minimum peak in Final Diff. Map        | -0.49 e <sup>-</sup> /Å <sup>3</sup>                                                                                  |
